# Supplementary material for: Gene co-expression analyses of health(span) across multiple species
Source: PubMed Central journal article supplement (PMC9706456; doi:10.1093/nargab/lqac083), 2022-11-29
Supplement: lqac083_supplemental_file.pdf [file lqac083_supplemental_file.pdf]

# Gene co-expression analyses of health(span) across multiple species

Steffen Möller<sup>1\*</sup>, Nadine Saul<sup>2</sup>, Elias Projahn<sup>1</sup>, Israel Barrantes<sup>1</sup>, Andr as G ezsi<sup>3</sup>, Michael Walter<sup>4</sup>, P eter Antal<sup>3</sup>, Georg Fuellen<sup>1</sup>

Earlier version submitted to <https://doi.org/10.1101/2021.04.08.439030>

<sup>1</sup> Rostock University Medical Center, Institute for Biostatistics and Informatics in Medicine and Ageing Research, Rostock, Germany

<sup>2</sup> Humboldt-University of Berlin, Institute of Biology, Berlin, Germany

<sup>3</sup> Budapest University of Technology and Economics, Department of Measurement and Information Systems, Budapest, Hungary

<sup>4</sup> Rostock University Medical Center, Institute for Clinical Chemistry and Laboratory Medicine, Rostock, Germany

\*corresponding author

## Supplement

### Figures

| GO:BP                         |            |                        |                       | stats |        |       |       |       |  |
|-------------------------------|------------|------------------------|-----------------------|-------|--------|-------|-------|-------|--|
| Term name                     | Term ID    | Padj                   | $-\log_{10}(P_{adj})$ | MN1   | PAK1P1 | SCN8B | TUBB1 | WIPF1 |  |
| actin filament-based movement | GO:0030048 | 1.235 $\times 10^{-2}$ | 0                     |       |        |       |       |       |  |

1 to 1 of 1 << Page 1 of 1 >>

| GO:CC                                        |            |                        |                       | stats |        |       |       |       |  |
|----------------------------------------------|------------|------------------------|-----------------------|-------|--------|-------|-------|-------|--|
| Term name                                    | Term ID    | Padj                   | $-\log_{10}(P_{adj})$ | MN1   | PAK1P1 | SCN8B | TUBB1 | WIPF1 |  |
| supramolecular fiber                         | GO:0099512 | 1.709 $\times 10^{-2}$ | 0                     |       |        |       |       |       |  |
| supramolecular polymer                       | GO:0099081 | 1.763 $\times 10^{-2}$ | 0                     |       |        |       |       |       |  |
| intracellular non-membrane-bounded organelle | GO:0043232 | 2.217 $\times 10^{-2}$ | 0                     |       |        |       |       |       |  |
| non-membrane-bounded organelle               | GO:0043228 | 2.239 $\times 10^{-2}$ | 0                     |       |        |       |       |       |  |

**Supplement Figure 1a: g:profiler gene set enrichment analysis of genes listed jointly in Tables 2 and 3.**

| GO:CC                              |            |                        |                       | stats  |         |       |       |      |     |       |        |      |        |       |       |         |         |         |       |       |       |       |       |        |         |       |       |        |       |  |
|------------------------------------|------------|------------------------|-----------------------|--------|---------|-------|-------|------|-----|-------|--------|------|--------|-------|-------|---------|---------|---------|-------|-------|-------|-------|-------|--------|---------|-------|-------|--------|-------|--|
| Term name                          | Term ID    | Padj                   | $-\log_{10}(P_{adj})$ | ADAM10 | AEBP1IP | CER1B | CEBPB | EF3P | FNZ | GNAS1 | KLHL19 | MTX1 | PAK1P1 | PAPD1 | PENK2 | PPP1R3B | PPP1R3C | PPP1R3D | RAB3A | RAB31 | RIPK2 | SCN8B | SIVA4 | SREBF1 | TAL1A7O | TUBB1 | WIPF1 | ZC3H15 | SOX11 |  |
| terminal cisterna                  | GO:0014802 | 2.875 $\times 10^{-3}$ | 0                     |        |         |       |       |      |     |       |        |      |        |       |       |         |         |         |       |       |       |       |       |        |         |       |       |        |       |  |
| glycogen granule                   | GO:0042587 | 1.003 $\times 10^{-2}$ | 0                     |        |         |       |       |      |     |       |        |      |        |       |       |         |         |         |       |       |       |       |       |        |         |       |       |        |       |  |
| PTW/PPP1 phosphatase complex       | GO:0072357 | 1.003 $\times 10^{-2}$ | 0                     |        |         |       |       |      |     |       |        |      |        |       |       |         |         |         |       |       |       |       |       |        |         |       |       |        |       |  |
| protein-containing complex         | GO:0032991 | 2.962 $\times 10^{-2}$ | 0                     |        |         |       |       |      |     |       |        |      |        |       |       |         |         |         |       |       |       |       |       |        |         |       |       |        |       |  |
| protein phosphatase type 1 complex | GO:0000164 | 4.981 $\times 10^{-2}$ | 0                     |        |         |       |       |      |     |       |        |      |        |       |       |         |         |         |       |       |       |       |       |        |         |       |       |        |       |  |

1 to 5 of 5 << Page 1 of 1 >>

| KEGG                   |            |                        |                       | stats  |         |       |       |      |     |       |        |      |        |       |       |         |         |         |       |       |       |       |       |        |         |       |       |        |       |  |
|------------------------|------------|------------------------|-----------------------|--------|---------|-------|-------|------|-----|-------|--------|------|--------|-------|-------|---------|---------|---------|-------|-------|-------|-------|-------|--------|---------|-------|-------|--------|-------|--|
| Term name              | Term ID    | Padj                   | $-\log_{10}(P_{adj})$ | ADAM10 | AEBP1IP | CER1B | CEBPB | EF3P | FNZ | GNAS1 | KLHL19 | MTX1 | PAK1P1 | PAPD1 | PENK2 | PPP1R3B | PPP1R3C | PPP1R3D | RAB3A | RAB31 | RIPK2 | SCN8B | SIVA4 | SREBF1 | TAL1A7O | TUBB1 | WIPF1 | ZC3H15 | SOX11 |  |
| Long-term potentiation | KEGG:04720 | 3.081 $\times 10^{-2}$ | 0                     |        |         |       |       |      |     |       |        |      |        |       |       |         |         |         |       |       |       |       |       |        |         |       |       |        |       |  |

**Supplement Figure 1b: g:profiler gene set enrichment analysis of genes listed in Table 3.**

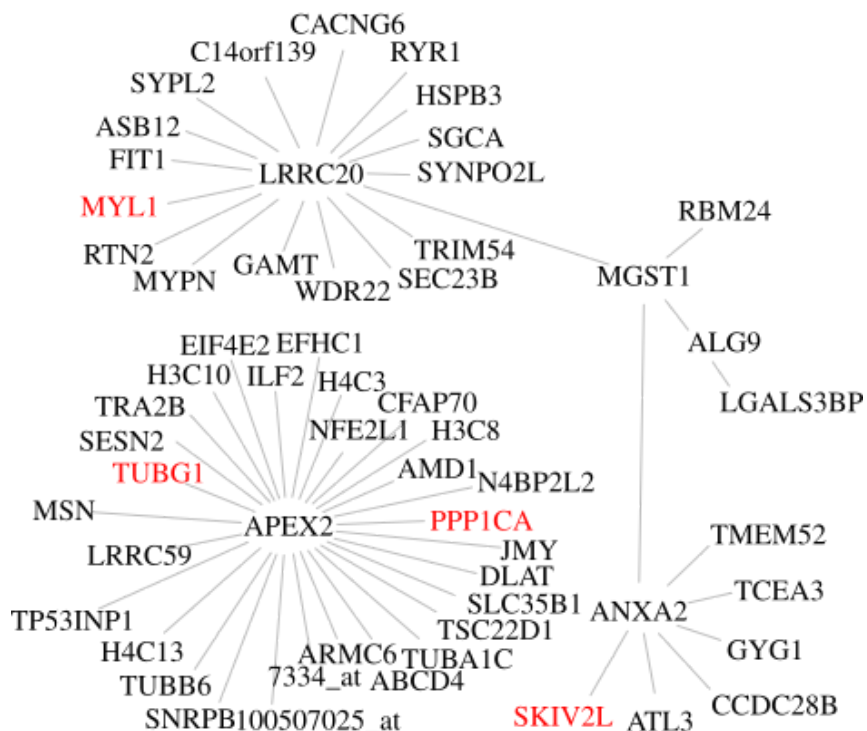

**Supplement Figure 2a: Gene interactions observed in human.** The genes MYL1, PPP1CA, SKIV2L and TUBG1 are hub genes in WGCNA-defined modules from multiple species (cf. Figure 1, here shown in red). This graph was created iteratively with the red genes as a seed, then adding all the gene-gene interactions from WGCNA in human experiments originating from these red genes, and then transitively adding all the interacting genes of those. The resulting graph is highly interconnected before applying the minimum spanning tree algorithm. The genes interacting with hub genes across species (in red) then appear marginalized by the three human-only hub genes ANXA2, APEX2, LRR20 and MGST1, given that the minimum spanning tree shows only the strongest correlations. ANXA2 is well described for a wide array of disease, i.e. cancer but also pulmonary fibrosis, and on a molecular level chimes in with vesicle fusion. APEX2 is a nuclease required for lymphocyte proliferation. LRR20 is not yet described but known to interact with the also mostly undescribed TOM1 that once more is thought to be involved in intracellular trafficking and the E3 SUMO-protein ligase ZBED1. MGST1 is an enzyme located at the ER and mitochondria, a transferase of glutathione, an antioxidant.

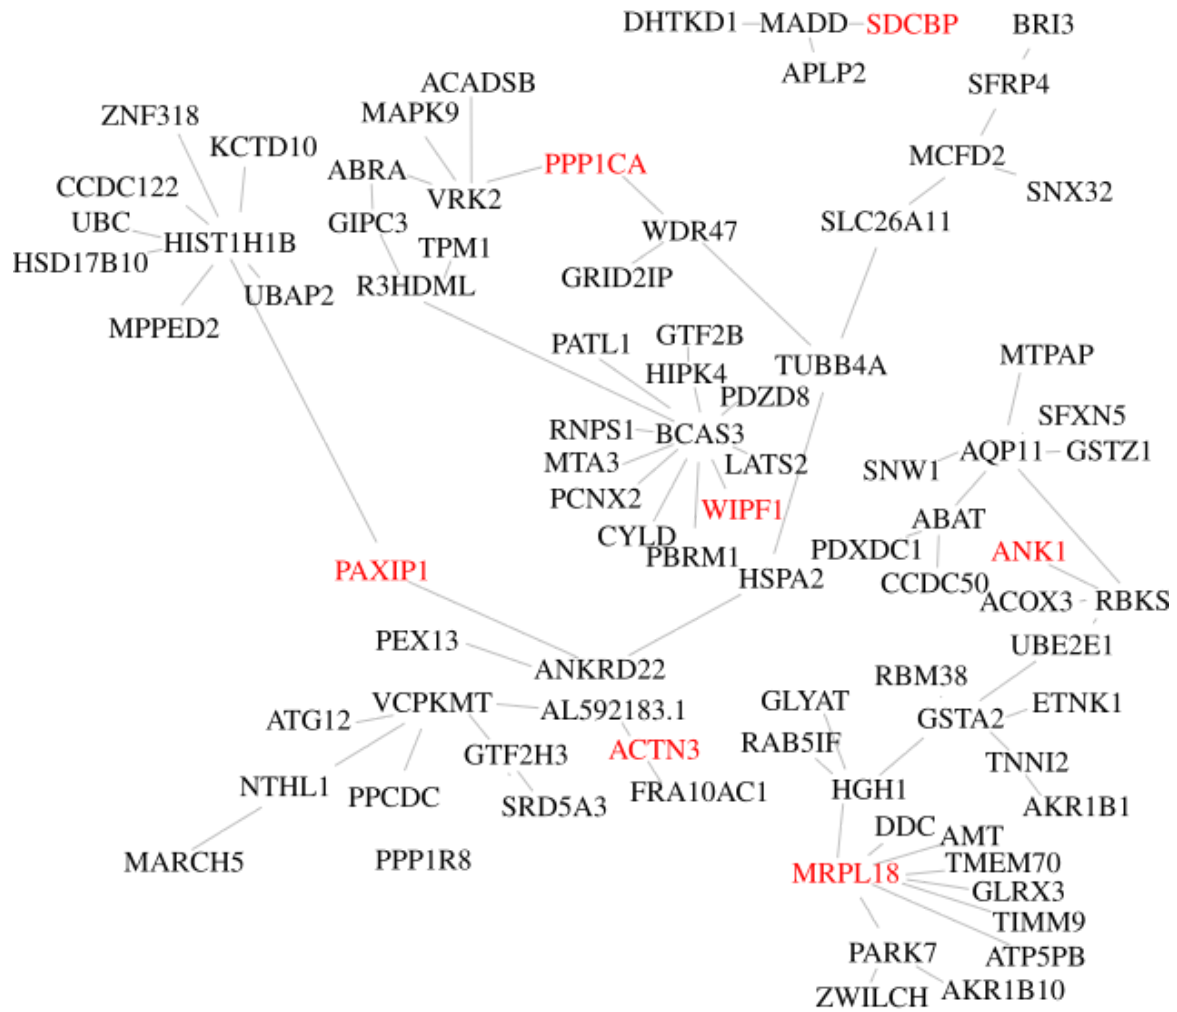

**Supplement Figure 2b:** Gene interactions observed in worm. The figure was prepared analogously to Supplement Figure 2a from gene interactions observed in the worm. Gene names were mapped to human orthologs for an easier comparison between species.

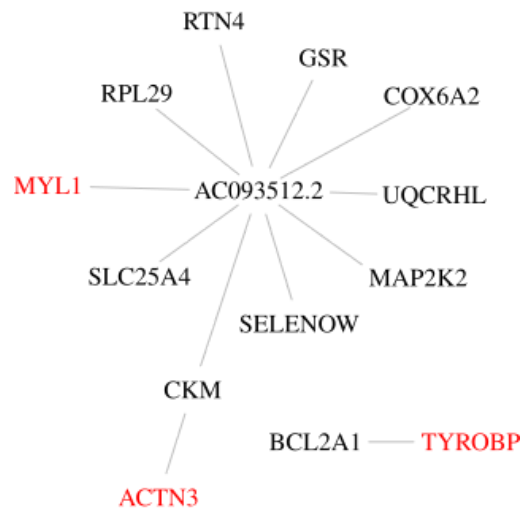

**Supplement Figure 2c: Gene interactions observed in rat.**

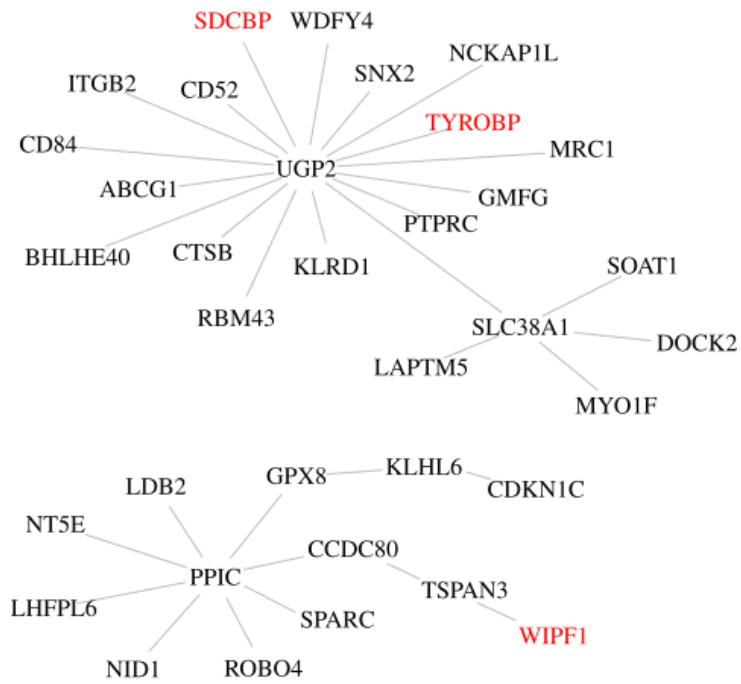

**Supplement Figure 2d: Gene interactions observed in mouse.**

| GO:MF                              |            |                        |                       | stats |     |      |       |      |      |       |         |       |       |      |      |         |      |       |       |  |
|------------------------------------|------------|------------------------|-----------------------|-------|-----|------|-------|------|------|-------|---------|-------|-------|------|------|---------|------|-------|-------|--|
| Term name                          | Term ID    | P <sub>adj</sub>       | $-\log_{10}(P_{adj})$ | 0     | ≤16 | CD52 | RBM43 | CD84 | CTSB | WDFV4 | SICSBAN | KLRD1 | PTPRC | UGP2 | MRC1 | NCKAP1L | GMFG | ITGB2 | ABCC1 |  |
| protein-containing complex binding | GO:0044877 | 2.774×10 <sup>-2</sup> |                       | ■     |     |      |       |      |      |       |         |       | ■     | ■    |      |         | ■    | ■     | ■     |  |

1 to 1 of 1 << Page 1 of 1 >>

| GO:BP                                                     |            |                        |                       | stats |     |      |       |      |      |       |         |       |       |      |      |         |      |       |       |  |
|-----------------------------------------------------------|------------|------------------------|-----------------------|-------|-----|------|-------|------|------|-------|---------|-------|-------|------|------|---------|------|-------|-------|--|
| Term name                                                 | Term ID    | P <sub>adj</sub>       | $-\log_{10}(P_{adj})$ | 0     | ≤16 | CD52 | RBM43 | CD84 | CTSB | WDFV4 | SICSBAN | KLRD1 | PTPRC | UGP2 | MRC1 | NCKAP1L | GMFG | ITGB2 | ABCC1 |  |
| leukocyte mediated immunity                               | GO:0002443 | 1.375×10 <sup>-3</sup> |                       | ■     |     |      |       |      |      |       |         |       |       |      |      |         |      |       |       |  |
| leukocyte degranulation                                   | GO:0043299 | 1.480×10 <sup>-3</sup> |                       | ■     |     |      |       |      |      |       |         |       |       |      |      |         |      |       |       |  |
| myeloid cell activation involved in immune response       | GO:0002275 | 1.647×10 <sup>-3</sup> |                       | ■     |     |      |       |      |      |       |         |       |       |      |      |         |      |       |       |  |
| myeloid leukocyte mediated immunity                       | GO:0002444 | 1.774×10 <sup>-3</sup> |                       | ■     |     |      |       |      |      |       |         |       |       |      |      |         |      |       |       |  |
| myeloid leukocyte activation                              | GO:0002274 | 5.387×10 <sup>-3</sup> |                       | ■     |     |      |       |      |      |       |         |       |       |      |      |         |      |       |       |  |
| leukocyte activation involved in immune response          | GO:0002366 | 7.896×10 <sup>-3</sup> |                       | ■     |     |      |       |      |      |       |         |       |       |      |      |         |      |       |       |  |
| cell activation involved in immune response               | GO:0002263 | 8.153×10 <sup>-3</sup> |                       | ■     |     |      |       |      |      |       |         |       |       |      |      |         |      |       |       |  |
| regulated exocytosis                                      | GO:0045055 | 1.450×10 <sup>-2</sup> |                       | ■     |     |      |       |      |      |       |         |       |       |      |      |         |      |       |       |  |
| positive regulation of gamma-delta T cell differentiation | GO:0045588 | 1.513×10 <sup>-2</sup> |                       | ■     |     |      |       |      |      |       |         |       |       |      |      |         |      |       |       |  |
| immune effector process                                   | GO:0002252 | 1.810×10 <sup>-2</sup> |                       | ■     |     |      |       |      |      |       |         |       |       |      |      |         |      |       |       |  |
| positive regulation of gamma-delta T cell activation      | GO:0046645 | 2.017×10 <sup>-2</sup> |                       | ■     |     |      |       |      |      |       |         |       |       |      |      |         |      |       |       |  |
| neutrophil degranulation                                  | GO:0043312 | 2.191×10 <sup>-2</sup> |                       | ■     |     |      |       |      |      |       |         |       |       |      |      |         |      |       |       |  |
| neutrophil activation involved in immune response         | GO:0002283 | 2.258×10 <sup>-2</sup> |                       | ■     |     |      |       |      |      |       |         |       |       |      |      |         |      |       |       |  |
| neutrophil mediated immunity                              | GO:0002446 | 2.515×10 <sup>-2</sup> |                       | ■     |     |      |       |      |      |       |         |       |       |      |      |         |      |       |       |  |
| neutrophil activation                                     | GO:0042119 | 2.564×10 <sup>-2</sup> |                       | ■     |     |      |       |      |      |       |         |       |       |      |      |         |      |       |       |  |
| regulation of gamma-delta T cell differentiation          | GO:0045586 | 2.592×10 <sup>-2</sup> |                       | ■     |     |      |       |      |      |       |         |       |       |      |      |         |      |       |       |  |
| granulocyte activation                                    | GO:0036230 | 2.743×10 <sup>-2</sup> |                       | ■     |     |      |       |      |      |       |         |       |       |      |      |         |      |       |       |  |
| secretion by cell                                         | GO:0032940 | 2.754×10 <sup>-2</sup> |                       | ■     |     |      |       |      |      |       |         |       |       |      |      |         |      |       |       |  |
| regulation of gamma-delta T cell activation               | GO:0046643 | 3.239×10 <sup>-2</sup> |                       | ■     |     |      |       |      |      |       |         |       |       |      |      |         |      |       |       |  |
| exocytosis                                                | GO:0006887 | 3.270×10 <sup>-2</sup> |                       | ■     |     |      |       |      |      |       |         |       |       |      |      |         |      |       |       |  |
| export from cell                                          | GO:0140352 | 3.535×10 <sup>-2</sup> |                       | ■     |     |      |       |      |      |       |         |       |       |      |      |         |      |       |       |  |
| gamma-delta T cell differentiation                        | GO:0042492 | 4.747×10 <sup>-2</sup> |                       | ■     |     |      |       |      |      |       |         |       |       |      |      |         |      |       |       |  |

1 to 22 of 22 << Page 1 of 1 >>

| GO:CC                                  |            |                        |                       | stats |     |      |       |      |      |       |         |       |       |      |      |         |      |       |       |  |
|----------------------------------------|------------|------------------------|-----------------------|-------|-----|------|-------|------|------|-------|---------|-------|-------|------|------|---------|------|-------|-------|--|
| Term name                              | Term ID    | P <sub>adj</sub>       | $-\log_{10}(P_{adj})$ | 0     | ≤16 | CD52 | RBM43 | CD84 | CTSB | WDFV4 | SICSBAN | KLRD1 | PTPRC | UGP2 | MRC1 | NCKAP1L | GMFG | ITGB2 | ABCC1 |  |
| external side of plasma membrane       | GO:0009897 | 2.121×10 <sup>-5</sup> |                       | ■     |     |      |       |      |      |       |         |       |       |      |      |         |      |       |       |  |
| cell surface                           | GO:0009986 | 1.031×10 <sup>-4</sup> |                       | ■     |     |      |       |      |      |       |         |       |       |      |      |         |      |       |       |  |
| side of membrane                       | GO:0098552 | 2.327×10 <sup>-4</sup> |                       | ■     |     |      |       |      |      |       |         |       |       |      |      |         |      |       |       |  |
| ficolin-1-rich granule                 | GO:0101002 | 7.090×10 <sup>-4</sup> |                       | ■     |     |      |       |      |      |       |         |       |       |      |      |         |      |       |       |  |
| vesicle                                | GO:0031982 | 3.815×10 <sup>-3</sup> |                       | ■     |     |      |       |      |      |       |         |       |       |      |      |         |      |       |       |  |
| cytoplasmic vesicle                    | GO:0031410 | 6.422×10 <sup>-3</sup> |                       | ■     |     |      |       |      |      |       |         |       |       |      |      |         |      |       |       |  |
| intracellular vesicle                  | GO:0097708 | 6.500×10 <sup>-3</sup> |                       | ■     |     |      |       |      |      |       |         |       |       |      |      |         |      |       |       |  |
| intrinsic component of plasma membrane | GO:0031226 | 6.681×10 <sup>-3</sup> |                       | ■     |     |      |       |      |      |       |         |       |       |      |      |         |      |       |       |  |
| secretory granule                      | GO:0030141 | 2.167×10 <sup>-2</sup> |                       | ■     |     |      |       |      |      |       |         |       |       |      |      |         |      |       |       |  |

1 to 9 of 9 << Page 1 of 1 >>

| REAC                     |                 |                        |                       | stats |     |      |       |      |      |       |         |       |       |      |      |         |      |       |       |
|--------------------------|-----------------|------------------------|-----------------------|-------|-----|------|-------|------|------|-------|---------|-------|-------|------|------|---------|------|-------|-------|
| Term name                | Term ID         | P <sub>adj</sub>       | $-\log_{10}(P_{adj})$ | 0     | ≤16 | CD52 | RBM43 | CD84 | CTSB | WDFV4 | SICSBAN | KLRD1 | PTPRC | UGP2 | MRC1 | NCKAP1L | GMFG | ITGB2 | ABCC1 |
| Neutrophil degranulation | REAC:R-HSA-6... | 3.042×10 <sup>-2</sup> |                       | ■     |     |      |       |      |      |       |         |       |       |      |      |         |      |       |       |

1 to 1 of 1 << Page 1 of 1 >>

| WP                    |           |                        |                       | stats |     |      |       |      |      |       |         |       |       |      |      |         |      |       |       |
|-----------------------|-----------|------------------------|-----------------------|-------|-----|------|-------|------|------|-------|---------|-------|-------|------|------|---------|------|-------|-------|
| Term name             | Term ID   | P <sub>adj</sub>       | $-\log_{10}(P_{adj})$ | 0     | ≤16 | CD52 | RBM43 | CD84 | CTSB | WDFV4 | SICSBAN | KLRD1 | PTPRC | UGP2 | MRC1 | NCKAP1L | GMFG | ITGB2 | ABCC1 |
| TYROBP Causal Network | WP:WP3945 | 2.593×10 <sup>-3</sup> |                       | ■     |     |      |       |      |      |       |         |       |       |      |      |         |      |       |       |

1 to 1 of 1 << Page 1 of 1 >>

| CORUM               |            |                        |                       | stats |     |      |       |      |      |       |         |       |       |      |      |         |      |       |       |
|---------------------|------------|------------------------|-----------------------|-------|-----|------|-------|------|------|-------|---------|-------|-------|------|------|---------|------|-------|-------|
| Term name           | Term ID    | P <sub>adj</sub>       | $-\log_{10}(P_{adj})$ | 0     | ≤16 | CD52 | RBM43 | CD84 | CTSB | WDFV4 | SICSBAN | KLRD1 | PTPRC | UGP2 | MRC1 | NCKAP1L | GMFG | ITGB2 | ABCC1 |
| ITGB2-RACK1 complex | CORUM:7013 | 4.999×10 <sup>-2</sup> |                       | ■     |     |      |       |      |      |       |         |       |       |      |      |         |      |       |       |

Supplement Figure 3a: g:Profiler GSEA on genes connecting hub genes TYROBP and SDCBP.

| GO:MF                              |            |                        |                       | stats |     |      |      |      |       |        |       |       |      |      |         |      |       |       |
|------------------------------------|------------|------------------------|-----------------------|-------|-----|------|------|------|-------|--------|-------|-------|------|------|---------|------|-------|-------|
| Term name                          | Term ID    | P <sub>adj</sub>       | $-\log_{10}(P_{adj})$ | 0     | ≤16 | CD52 | CD84 | CTSB | WDFV4 | SIC3B1 | KLKB1 | PTPRC | UGP2 | MRC1 | NCKAIP1 | GMPG | ITGB2 | ARC01 |
| protein-containing complex binding | GO:0044877 | 2.774×10 <sup>-2</sup> |                       | ■     |     |      |      |      |       |        |       |       |      |      |         |      |       |       |

1 to 1 of 1 << Page 1 of 1 >>

| GO:BP                                                     |            |                        |                       | stats |     |      |      |      |       |        |       |       |      |      |         |      |       |       |
|-----------------------------------------------------------|------------|------------------------|-----------------------|-------|-----|------|------|------|-------|--------|-------|-------|------|------|---------|------|-------|-------|
| Term name                                                 | Term ID    | P <sub>adj</sub>       | $-\log_{10}(P_{adj})$ | 0     | ≤16 | CD52 | CD84 | CTSB | WDFV4 | SIC3B1 | KLKB1 | PTPRC | UGP2 | MRC1 | NCKAIP1 | GMPG | ITGB2 | ARC01 |
| leukocyte mediated immunity                               | GO:0002443 | 1.375×10 <sup>-3</sup> |                       | ■     |     |      |      |      |       |        |       |       |      |      |         |      |       |       |
| leukocyte degranulation                                   | GO:0043299 | 1.480×10 <sup>-3</sup> |                       | ■     |     |      |      |      |       |        |       |       |      |      |         |      |       |       |
| myeloid cell activation involved in immune response       | GO:0002275 | 1.647×10 <sup>-3</sup> |                       | ■     |     |      |      |      |       |        |       |       |      |      |         |      |       |       |
| myeloid leukocyte mediated immunity                       | GO:0002444 | 1.774×10 <sup>-3</sup> |                       | ■     |     |      |      |      |       |        |       |       |      |      |         |      |       |       |
| myeloid leukocyte activation                              | GO:0002274 | 5.387×10 <sup>-3</sup> |                       | ■     |     |      |      |      |       |        |       |       |      |      |         |      |       |       |
| leukocyte activation involved in immune response          | GO:0002366 | 7.896×10 <sup>-3</sup> |                       | ■     |     |      |      |      |       |        |       |       |      |      |         |      |       |       |
| cell activation involved in immune response               | GO:0002263 | 8.153×10 <sup>-3</sup> |                       | ■     |     |      |      |      |       |        |       |       |      |      |         |      |       |       |
| regulated exocytosis                                      | GO:0045055 | 1.450×10 <sup>-2</sup> |                       | ■     |     |      |      |      |       |        |       |       |      |      |         |      |       |       |
| positive regulation of gamma-delta T cell differentiation | GO:0045588 | 1.513×10 <sup>-2</sup> |                       | ■     |     |      |      |      |       |        |       |       |      |      |         |      |       |       |
| immune effector process                                   | GO:0002252 | 1.810×10 <sup>-2</sup> |                       | ■     |     |      |      |      |       |        |       |       |      |      |         |      |       |       |
| positive regulation of gamma-delta T cell activation      | GO:0046645 | 2.017×10 <sup>-2</sup> |                       | ■     |     |      |      |      |       |        |       |       |      |      |         |      |       |       |
| neutrophil degranulation                                  | GO:0043312 | 2.191×10 <sup>-2</sup> |                       | ■     |     |      |      |      |       |        |       |       |      |      |         |      |       |       |
| neutrophil activation involved in immune response         | GO:0002283 | 2.258×10 <sup>-2</sup> |                       | ■     |     |      |      |      |       |        |       |       |      |      |         |      |       |       |
| neutrophil mediated immunity                              | GO:0002446 | 2.515×10 <sup>-2</sup> |                       | ■     |     |      |      |      |       |        |       |       |      |      |         |      |       |       |
| neutrophil activation                                     | GO:0042119 | 2.564×10 <sup>-2</sup> |                       | ■     |     |      |      |      |       |        |       |       |      |      |         |      |       |       |
| regulation of gamma-delta T cell differentiation          | GO:0045586 | 2.592×10 <sup>-2</sup> |                       | ■     |     |      |      |      |       |        |       |       |      |      |         |      |       |       |
| granulocyte activation                                    | GO:0036230 | 2.743×10 <sup>-2</sup> |                       | ■     |     |      |      |      |       |        |       |       |      |      |         |      |       |       |
| secretion by cell                                         | GO:0032940 | 2.754×10 <sup>-2</sup> |                       | ■     |     |      |      |      |       |        |       |       |      |      |         |      |       |       |
| regulation of gamma-delta T cell activation               | GO:0046643 | 3.239×10 <sup>-2</sup> |                       | ■     |     |      |      |      |       |        |       |       |      |      |         |      |       |       |
| exocytosis                                                | GO:0006887 | 3.270×10 <sup>-2</sup> |                       | ■     |     |      |      |      |       |        |       |       |      |      |         |      |       |       |
| export from cell                                          | GO:0140352 | 3.535×10 <sup>-2</sup> |                       | ■     |     |      |      |      |       |        |       |       |      |      |         |      |       |       |
| gamma-delta T cell differentiation                        | GO:0042492 | 4.747×10 <sup>-2</sup> |                       | ■     |     |      |      |      |       |        |       |       |      |      |         |      |       |       |

1 to 22 of 22 << Page 1 of 1 >>

| GO:CC                                  |            |                        |                       | stats |     |      |      |      |       |        |       |       |      |      |         |      |       |       |
|----------------------------------------|------------|------------------------|-----------------------|-------|-----|------|------|------|-------|--------|-------|-------|------|------|---------|------|-------|-------|
| Term name                              | Term ID    | P <sub>adj</sub>       | $-\log_{10}(P_{adj})$ | 0     | ≤16 | CD52 | CD84 | CTSB | WDFV4 | SIC3B1 | KLKB1 | PTPRC | UGP2 | MRC1 | NCKAIP1 | GMPG | ITGB2 | ARC01 |
| external side of plasma membrane       | GO:0009897 | 2.121×10 <sup>-5</sup> |                       | ■     |     |      |      |      |       |        |       |       |      |      |         |      |       |       |
| cell surface                           | GO:0009986 | 1.031×10 <sup>-4</sup> |                       | ■     |     |      |      |      |       |        |       |       |      |      |         |      |       |       |
| side of membrane                       | GO:0098552 | 2.327×10 <sup>-4</sup> |                       | ■     |     |      |      |      |       |        |       |       |      |      |         |      |       |       |
| ficolin-1-rich granule                 | GO:0101002 | 7.090×10 <sup>-4</sup> |                       | ■     |     |      |      |      |       |        |       |       |      |      |         |      |       |       |
| vesicle                                | GO:0031982 | 3.815×10 <sup>-3</sup> |                       | ■     |     |      |      |      |       |        |       |       |      |      |         |      |       |       |
| cytoplasmic vesicle                    | GO:0031410 | 6.422×10 <sup>-3</sup> |                       | ■     |     |      |      |      |       |        |       |       |      |      |         |      |       |       |
| intracellular vesicle                  | GO:0097708 | 6.500×10 <sup>-3</sup> |                       | ■     |     |      |      |      |       |        |       |       |      |      |         |      |       |       |
| intrinsic component of plasma membrane | GO:0031226 | 6.681×10 <sup>-3</sup> |                       | ■     |     |      |      |      |       |        |       |       |      |      |         |      |       |       |
| secretory granule                      | GO:0030141 | 2.167×10 <sup>-2</sup> |                       | ■     |     |      |      |      |       |        |       |       |      |      |         |      |       |       |

1 to 9 of 9 << Page 1 of 1 >>

| REAC                     |                 |                        |                       | stats |     |      |      |      |       |        |       |       |      |      |         |      |       |       |
|--------------------------|-----------------|------------------------|-----------------------|-------|-----|------|------|------|-------|--------|-------|-------|------|------|---------|------|-------|-------|
| Term name                | Term ID         | P <sub>adj</sub>       | $-\log_{10}(P_{adj})$ | 0     | ≤16 | CD52 | CD84 | CTSB | WDFV4 | SIC3B1 | KLKB1 | PTPRC | UGP2 | MRC1 | NCKAIP1 | GMPG | ITGB2 | ARC01 |
| Neutrophil degranulation | REAC:R-HSA-6... | 3.042×10 <sup>-2</sup> |                       | ■     |     |      |      |      |       |        |       |       |      |      |         |      |       |       |

1 to 1 of 1 << Page 1 of 1 >>

| WP                    |           |                        |                       | stats |     |      |      |      |       |        |       |       |      |      |         |      |       |       |
|-----------------------|-----------|------------------------|-----------------------|-------|-----|------|------|------|-------|--------|-------|-------|------|------|---------|------|-------|-------|
| Term name             | Term ID   | P <sub>adj</sub>       | $-\log_{10}(P_{adj})$ | 0     | ≤16 | CD52 | CD84 | CTSB | WDFV4 | SIC3B1 | KLKB1 | PTPRC | UGP2 | MRC1 | NCKAIP1 | GMPG | ITGB2 | ARC01 |
| TYROBP Causal Network | WP:WP3945 | 2.593×10 <sup>-3</sup> |                       | ■     |     |      |      |      |       |        |       |       |      |      |         |      |       |       |

1 to 1 of 1 << Page 1 of 1 >>

| CORUM               |            |                        |                       | stats |     |      |      |      |       |        |       |       |      |      |         |      |       |       |
|---------------------|------------|------------------------|-----------------------|-------|-----|------|------|------|-------|--------|-------|-------|------|------|---------|------|-------|-------|
| Term name           | Term ID    | P <sub>adj</sub>       | $-\log_{10}(P_{adj})$ | 0     | ≤16 | CD52 | CD84 | CTSB | WDFV4 | SIC3B1 | KLKB1 | PTPRC | UGP2 | MRC1 | NCKAIP1 | GMPG | ITGB2 | ARC01 |
| ITGB2-RACK1 complex | CORUM:7013 | 4.999×10 <sup>-2</sup> |                       | ■     |     |      |      |      |       |        |       |       |      |      |         |      |       |       |

1 to 1 of 1 << Page 1 of 1 >>

Supplement Figure 3b: g-Profiler GSEA on genes connecting hub genes MYL1 and SKIV2L.

| GO:BP                                              |            |                        |                       | stats  |        |       |        |     |      |      |      |      |     |       |       |       |        |       |      |      |      |       |       |       |        |         |       |         |        |  |
|----------------------------------------------------|------------|------------------------|-----------------------|--------|--------|-------|--------|-----|------|------|------|------|-----|-------|-------|-------|--------|-------|------|------|------|-------|-------|-------|--------|---------|-------|---------|--------|--|
| Term name                                          | Term ID    | P <sub>adj</sub>       | $-\log_{10}(P_{adj})$ | SIC3B1 | NABP12 | EFHC1 | CFAP70 | JMY | DLAT | AMO1 | AFR2 | ILF2 | MSN | WFE21 | LRRC9 | ABCD4 | TRAF2B | SNR98 | H3CB | H3C9 | H3C3 | SESN2 | H3C13 | TUBB8 | TUBA1C | TSC22D1 | ANRC8 | TP53BP1 | EIF4E2 |  |
| DNA replication-dependent nucleosome assembly      | GO:0006335 | 1.954×10 <sup>-4</sup> | 6.61                  | ■      |        |       |        |     |      |      |      |      |     |       |       |       |        |       |      |      |      |       |       |       |        |         |       |         |        |  |
| DNA replication-dependent nucleosome organization  | GO:0034723 | 1.954×10 <sup>-4</sup> | 6.61                  | ■      |        |       |        |     |      |      |      |      |     |       |       |       |        |       |      |      |      |       |       |       |        |         |       |         |        |  |
| rDNA heterochromatin assembly                      | GO:0000183 | 4.927×10 <sup>-4</sup> | 5.81                  | ■      |        |       |        |     |      |      |      |      |     |       |       |       |        |       |      |      |      |       |       |       |        |         |       |         |        |  |
| regulation of gene silencing by miRNA              | GO:0060964 | 1.021×10 <sup>-3</sup> | 4.89                  | ■      |        |       |        |     |      |      |      |      |     |       |       |       |        |       |      |      |      |       |       |       |        |         |       |         |        |  |
| regulation of posttranscriptional gene silencing   | GO:0060147 | 1.111×10 <sup>-3</sup> | 4.79                  | ■      |        |       |        |     |      |      |      |      |     |       |       |       |        |       |      |      |      |       |       |       |        |         |       |         |        |  |
| regulation of gene silencing by RNA                | GO:0060966 | 1.158×10 <sup>-3</sup> | 4.73                  | ■      |        |       |        |     |      |      |      |      |     |       |       |       |        |       |      |      |      |       |       |       |        |         |       |         |        |  |
| regulation of gene silencing                       | GO:0060968 | 2.398×10 <sup>-3</sup> | 4.22                  | ■      |        |       |        |     |      |      |      |      |     |       |       |       |        |       |      |      |      |       |       |       |        |         |       |         |        |  |
| heterochromatin assembly                           | GO:0031507 | 5.682×10 <sup>-3</sup> | 3.84                  | ■      |        |       |        |     |      |      |      |      |     |       |       |       |        |       |      |      |      |       |       |       |        |         |       |         |        |  |
| regulation of megakaryocyte differentiation        | GO:0045652 | 9.051×10 <sup>-3</sup> | 3.54                  | ■      |        |       |        |     |      |      |      |      |     |       |       |       |        |       |      |      |      |       |       |       |        |         |       |         |        |  |
| heterochromatin organization                       | GO:0070828 | 9.501×10 <sup>-3</sup> | 3.48                  | ■      |        |       |        |     |      |      |      |      |     |       |       |       |        |       |      |      |      |       |       |       |        |         |       |         |        |  |
| megakaryocyte differentiation                      | GO:0030219 | 1.994×10 <sup>-2</sup> | 3.21                  | ■      |        |       |        |     |      |      |      |      |     |       |       |       |        |       |      |      |      |       |       |       |        |         |       |         |        |  |
| negative regulation of gene expression, epigenetic | GO:0045814 | 4.962×10 <sup>-2</sup> | 2.90                  | ■      |        |       |        |     |      |      |      |      |     |       |       |       |        |       |      |      |      |       |       |       |        |         |       |         |        |  |

1 to 12 of 12 << < Page 1 of 1 > >

| GO:CC                 |            |                        |                       | stats  |        |       |        |     |      |      |      |      |     |       |       |       |        |       |      |      |      |       |       |       |        |         |       |         |        |  |
|-----------------------|------------|------------------------|-----------------------|--------|--------|-------|--------|-----|------|------|------|------|-----|-------|-------|-------|--------|-------|------|------|------|-------|-------|-------|--------|---------|-------|---------|--------|--|
| Term name             | Term ID    | P <sub>adj</sub>       | $-\log_{10}(P_{adj})$ | SIC3B1 | NABP12 | EFHC1 | CFAP70 | JMY | DLAT | AMO1 | AFR2 | ILF2 | MSN | WFE21 | LRRC9 | ABCD4 | TRAF2B | SNR98 | H3CB | H3C9 | H3C3 | SESN2 | H3C13 | TUBB8 | TUBA1C | TSC22D1 | ANRC8 | TP53BP1 | EIF4E2 |  |
| nucleosome            | GO:0000786 | 3.405×10 <sup>-3</sup> | 4.46                  | ■      |        |       |        |     |      |      |      |      |     |       |       |       |        |       |      |      |      |       |       |       |        |         |       |         |        |  |
| DNA packaging complex | GO:0044815 | 4.325×10 <sup>-3</sup> | 4.31                  | ■      |        |       |        |     |      |      |      |      |     |       |       |       |        |       |      |      |      |       |       |       |        |         |       |         |        |  |
| protein-DNA complex   | GO:0032993 | 4.086×10 <sup>-2</sup> | 3.19                  | ■      |        |       |        |     |      |      |      |      |     |       |       |       |        |       |      |      |      |       |       |       |        |         |       |         |        |  |

1 to 3 of 3 << < Page 1 of 1 > >

| KEGG                         |            |                        |                       | stats  |        |       |        |     |      |      |      |      |     |       |       |       |        |       |      |      |      |       |       |       |        |         |       |         |        |  |
|------------------------------|------------|------------------------|-----------------------|--------|--------|-------|--------|-----|------|------|------|------|-----|-------|-------|-------|--------|-------|------|------|------|-------|-------|-------|--------|---------|-------|---------|--------|--|
| Term name                    | Term ID    | P <sub>adj</sub>       | $-\log_{10}(P_{adj})$ | SIC3B1 | NABP12 | EFHC1 | CFAP70 | JMY | DLAT | AMO1 | AFR2 | ILF2 | MSN | WFE21 | LRRC9 | ABCD4 | TRAF2B | SNR98 | H3CB | H3C9 | H3C3 | SESN2 | H3C13 | TUBB8 | TUBA1C | TSC22D1 | ANRC8 | TP53BP1 | EIF4E2 |  |
| Systemic lupus erythematosus | KEGG:05322 | 1.914×10 <sup>-4</sup> | 6.77                  | ■      |        |       |        |     |      |      |      |      |     |       |       |       |        |       |      |      |      |       |       |       |        |         |       |         |        |  |
| Alcoholism                   | KEGG:05034 | 1.991×10 <sup>-2</sup> | 3.20                  | ■      |        |       |        |     |      |      |      |      |     |       |       |       |        |       |      |      |      |       |       |       |        |         |       |         |        |  |

1 to 2 of 2 << < Page 1 of 1 > >

|                         |                  |                        |      | stats  |        |       |        |     |      |      |      |      |     |       |       |       |        |       |      |      |      |       |       |       |        |         |       |         |        |  |
|-------------------------|------------------|------------------------|------|--------|--------|-------|--------|-----|------|------|------|------|-----|-------|-------|-------|--------|-------|------|------|------|-------|-------|-------|--------|---------|-------|---------|--------|--|
| Term ID                 | P <sub>adj</sub> | $-\log_{10}(P_{adj})$  |      | SIC3B1 | NABP12 | EFHC1 | CFAP70 | JMY | DLAT | AMO1 | AFR2 | ILF2 | MSN | WFE21 | LRRC9 | ABCD4 | TRAF2B | SNR98 | H3CB | H3C9 | H3C3 | SESN2 | H3C13 | TUBB8 | TUBA1C | TSC22D1 | ANRC8 | TP53BP1 | EIF4E2 |  |
| Recycling pathway of L1 | REAC:R-HSA-4...  | 7.327×10 <sup>-3</sup> | 4.31 | ■      |        |       |        |     |      |      |      |      |     |       |       |       |        |       |      |      |      |       |       |       |        |         |       |         |        |  |

1 to 1 of 1 << < Page 1 of 1 > >

| WP                    |           |                        |                       | stats  |        |       |        |     |      |      |      |      |     |       |       |       |        |       |      |      |      |       |       |       |        |         |       |         |        |  |
|-----------------------|-----------|------------------------|-----------------------|--------|--------|-------|--------|-----|------|------|------|------|-----|-------|-------|-------|--------|-------|------|------|------|-------|-------|-------|--------|---------|-------|---------|--------|--|
| Term name             | Term ID   | P <sub>adj</sub>       | $-\log_{10}(P_{adj})$ | SIC3B1 | NABP12 | EFHC1 | CFAP70 | JMY | DLAT | AMO1 | AFR2 | ILF2 | MSN | WFE21 | LRRC9 | ABCD4 | TRAF2B | SNR98 | H3CB | H3C9 | H3C3 | SESN2 | H3C13 | TUBB8 | TUBA1C | TSC22D1 | ANRC8 | TP53BP1 | EIF4E2 |  |
| Histone Modifications | WP:WP2369 | 2.074×10 <sup>-3</sup> | 4.58                  | ■      |        |       |        |     |      |      |      |      |     |       |       |       |        |       |      |      |      |       |       |       |        |         |       |         |        |  |

1 to 1 of 1 << < Page 1 of 1 > >

| MIRNA       |                 |                        |                       | stats  |        |       |        |     |      |      |      |      |     |       |       |       |        |       |      |      |      |       |       |       |        |         |       |         |        |  |
|-------------|-----------------|------------------------|-----------------------|--------|--------|-------|--------|-----|------|------|------|------|-----|-------|-------|-------|--------|-------|------|------|------|-------|-------|-------|--------|---------|-------|---------|--------|--|
| Term name   | Term ID         | P <sub>adj</sub>       | $-\log_{10}(P_{adj})$ | SIC3B1 | NABP12 | EFHC1 | CFAP70 | JMY | DLAT | AMO1 | AFR2 | ILF2 | MSN | WFE21 | LRRC9 | ABCD4 | TRAF2B | SNR98 | H3CB | H3C9 | H3C3 | SESN2 | H3C13 | TUBB8 | TUBA1C | TSC22D1 | ANRC8 | TP53BP1 | EIF4E2 |  |
| hsa-miR-484 | MIRNA:hsa-mi... | 4.270×10 <sup>-2</sup> | 3.37                  | ■      |        |       |        |     |      |      |      |      |     |       |       |       |        |       |      |      |      |       |       |       |        |         |       |         |        |  |

1 to 1 of 1 << < Page 1 of 1 > >

Supplement Figure 3c: *g*-Profiler GSEA on genes connecting hub genes *TUBG1* and *PPP1CA*.

## Tables

**Supplement Table 1: List of ArrayExpress/GEO files used as input in our study.** This table provides an overview of the transcriptomics experiments that were retrieved for this study. Each experiment was processed by a regular WGCNA workflow with unsigned correlation. Interactions were collected for the 30 most connected (hub) genes in each module. The column Modules lists the number of modules found for the experiment that feature an eigengene that correlates (with  $P < 0.05$ ) with the samples' health phenotype score. Within each module, only interactions with an adjacency value above the 95<sup>th</sup> percentile of an experiment were considered. The rightmost column lists the number of different hub genes that are paired in any of these interactions. Numbers in parentheses give the number of genes/interactions that could be mapped to ortholog genes in the human; for human data, the number of orthologs in worm are shown. For an interaction, both of the paired genes need to have orthologs assigned; otherwise they were not considered for the count.

| Accession                                 | Description                                                                                                                                                                                                                                                                                  | Number of (with orthologs)                                                                                                                                                                                                       |                                          |         |                |                  |
|-------------------------------------------|----------------------------------------------------------------------------------------------------------------------------------------------------------------------------------------------------------------------------------------------------------------------------------------------|----------------------------------------------------------------------------------------------------------------------------------------------------------------------------------------------------------------------------------|------------------------------------------|---------|----------------|------------------|
|                                           |                                                                                                                                                                                                                                                                                              | Treatment groups                                                                                                                                                                                                                 | Samples [total <sup>1</sup> / per group] | Modules | Inter- actions | Genes            |
| <b>a) Mouse experiments on healthspan</b> |                                                                                                                                                                                                                                                                                              |                                                                                                                                                                                                                                  |                                          |         |                |                  |
| <a href="#">E-GEOD-19102</a><br>(array)   | i) high-fat diet + 100mg/kg SRT1720, ii) high-fat diet + 30mg/kg SRT1720, iii) high-fat diet, iv) standard AIN-93G diet                                                                                                                                                                      | An activator of Sirt1, SRT1720, extends healthspan and lifespan in diet-induced obese mice; samples: liver tissue from strain C57BL/6J                                                                                           | 12/3                                     | 10      | 324 (182)      | 28 (20)          |
| <a href="#">E-GEOD-34773</a><br>(array)   | i) PGC-1a skeletal muscle specific knockout, ii) PGC-1a skeletal muscle specific knockout + CR, iii) WT, iv) WT + CR                                                                                                                                                                         | PGC-1a is a transcriptional coactivator that regulates mitochondrial function and is induced by CR; PGC-1a mediates mitochondrial, but not metabolic, changes during calorie restriction ( <a href="#">Finley et al., 2012</a> ) | 26/6-7                                   | 12      | 0 (0)          | 0 (0)            |
| <a href="#">E-GEOD-40936</a><br>(array)   | i) ad libitum diet, muscle tissue, ii) ad libitum diet + 0.1% w/w metformin, muscle tissue, iii) 40% calorically restricted diet, muscle tissue, iv) ad libitum diet, liver tissue, v) ad libitum diet + 0.1% w/w metformin, liver tissue, vi) 40% calorically restricted diet, liver tissue | Chronic treatment with low dose of metformin (0.1% w/w in diet) starting at one year of age extends health and lifespan in male mice, while a higher dose (1% w/w) was toxic                                                     | 30/5                                     | 1       | 434 (0)        | 29 (23)          |
| <a href="#">E-GEOD-49000</a><br>(array)   | i) standard diet, muscle tissue, ii) standard diet liver tissue, iii) standard diet + SRT2104, muscle tissue, iv) standard diet + SRT2104, liver tissue, v) 40% Caloric restriction, muscle tissue, vi) 40% Caloric restriction, liver tissue                                                | SRT2104, a synthetic small molecule activator of SIRT1, extends survival of male mice on a standard diet and preserves bone and muscle mass ( <a href="#">Mercken et al., 2014</a> )                                             | 30/5                                     |         |                | no modules found |



|                                           |                                                                                                                                                                                                                                                                                                                                                                                                                                            |                                                                                                                                              |      |   |           |         |
|-------------------------------------------|--------------------------------------------------------------------------------------------------------------------------------------------------------------------------------------------------------------------------------------------------------------------------------------------------------------------------------------------------------------------------------------------------------------------------------------------|----------------------------------------------------------------------------------------------------------------------------------------------|------|---|-----------|---------|
| <a href="#">E-GEOD-54853</a><br>(RNA-seq) | i) 10 g/kg D-Glucoseamine, ii) untreated                                                                                                                                                                                                                                                                                                                                                                                                   | D-Glucoseamine mimics a ketogenic diet and extends lifespan of aging C57BL/6 mice                                                            | 12/6 | 1 | 435 (0)   | 30 (19) |
| <a href="#">E-GEOD-55272</a><br>(array)   | i) WT, 5 months, liver tissue, ii) WT, 24 months, liver tissue, iii) WT, 5 months, muscle tissue, iv) WT, 24 months, muscle tissue, v) WT, 5 months, adipose tissue, vi) WT, 24 months, adipose tissue, vii) Myc+/-, 5 months, liver tissue, viii) Myc+/-, 24 months, liver tissue, ix) Myc+/-, 5 months, muscle tissue, x) Myc+/-, 24 months, muscle tissue, xi) Myc+/-, 5 months, adipose tissue, xii) Myc+/-, 24 months, adipose tissue | The pleiotropic transcription factor MYC is a proto-oncogene and Myc+/- heterozygous mice have extended lifespan and improved healthspan     | 36/3 | 6 | 567 (377) | 79 (64) |
| <a href="#">E-MTAB-6578</a><br>(RNA-seq)  | female heart tissue: i) 10 weeks, HGPS-/- mutants, ii) 10 weeks, HGPS-/-; NAT10-/- double mutants, iii) 10 weeks, NAT10-/- mutants, iv) 10 weeks, HGPS-/- mutants + 100 mg/kg remodelin, v) 104 weeks, WT, vi) 10 weeks, WT                                                                                                                                                                                                                | Targeting NAT10 enhances healthspan and lifespan in a mouse model of human accelerated aging syndrome (Hutchinson-Gilford progeria syndrome) | 12/2 | 1 | 0 (0)     | 0 (0)   |

#### b) Rat experiments on healthspan

|                                         |                                   |                                                                                                                                                            |      |   |          |         |
|-----------------------------------------|-----------------------------------|------------------------------------------------------------------------------------------------------------------------------------------------------------|------|---|----------|---------|
| <a href="#">E-GEOD-38062</a><br>(array) | i) fed ad libitum, ii) fed 40% CR | Muscle specimens of rats following a calorie restriction (40%) diet vs ad libitum fed rats; age: from 2-27 months ( <a href="#">Mercken et al., 2013</a> ) | 10/5 | 8 | 467 (81) | 57 (24) |
|-----------------------------------------|-----------------------------------|------------------------------------------------------------------------------------------------------------------------------------------------------------|------|---|----------|---------|

#### c) Human experiments on healthspan

|                                         |                                                                                                |                                                                                                             |          |   |           |         |
|-----------------------------------------|------------------------------------------------------------------------------------------------|-------------------------------------------------------------------------------------------------------------|----------|---|-----------|---------|
| <a href="#">E-GEOD-38012</a><br>(array) | i) middle-aged humans under CR diet, ii) middle-aged humans under western diet                 | Skeletal muscle specimens of humans following a calorie restriction diet vs humans following a Western diet | 25/10-15 | 2 | 405 (324) | 28 (25) |
| <a href="#">E-GEOD-66236</a><br>(array) | i) adipocytes proliferating in culture, ii) adipocytes in gamma-irradiation induced senescence | Difference between senescent and non-senescent cells in order to develop senolytic drugs                    | 16/8     | 1 | 435 (276) | 30 (24) |

#### d) Worm experiments on healthspan

|                                        |                                         |                                                                                                |     |   |        |        |
|----------------------------------------|-----------------------------------------|------------------------------------------------------------------------------------------------|-----|---|--------|--------|
| <a href="#">E-GEOD-8696</a><br>(array) | i) 4 μM, ii) 20 μM, & iii) 500 μM hemin | To understand heme homeostasis, genes transcriptionally regulated by heme should be identified | 9/3 | 4 | 22 (0) | 20 (7) |
|----------------------------------------|-----------------------------------------|------------------------------------------------------------------------------------------------|-----|---|--------|--------|

|                                            |                                                                                                                                                                                                                                                                                                                                                                                                               |                                                                                                                                                                                                                                                                                                                   |        |   |         |         |                  |
|--------------------------------------------|---------------------------------------------------------------------------------------------------------------------------------------------------------------------------------------------------------------------------------------------------------------------------------------------------------------------------------------------------------------------------------------------------------------|-------------------------------------------------------------------------------------------------------------------------------------------------------------------------------------------------------------------------------------------------------------------------------------------------------------------|--------|---|---------|---------|------------------|
| <a href="#">E-GEOD-9246</a><br>(array)     | i) <i>slr-2</i> (ku297) mutants, ii) WT                                                                                                                                                                                                                                                                                                                                                                       | ( <a href="#">Rajagopal et al., 2008</a> )<br>Transcription profiling of <i>C. elegans slr-2</i> (C2H2 Zn-finger protein) mutants at L1 stage                                                                                                                                                                     | 6/3    | 1 | 434     | 29 (14) | (104)            |
| <a href="#">E-GEOD-9301</a><br>(array)     | i) 99% O2 (oxidative stress), ii) 99% O2 + <i>skn-1</i> RNAi, iii) untreated                                                                                                                                                                                                                                                                                                                                  | <i>C. elegans</i> treated with oxidative stress in absence and presence of the transcription factor SKN-1, which is involved in response to oxidative stress                                                                                                                                                      | 11/3-4 |   |         |         | no modules found |
| <a href="#">E-GEOD-21531</a><br>(array)    | i) <i>unc-32</i> ; <i>glp-1</i> double mutants (excess proliferation), ii) <i>unc-32</i> mutants                                                                                                                                                                                                                                                                                                              | Analysis of germ cell proliferation in <i>unc-32</i> (e189); <i>glp-1</i> (oz112gf) double mutants (excess germ cell proliferation) compared to <i>unc-32</i> (e189) mutants as control ( <a href="#">Waters et al., 2010</a> )                                                                                   | 8/4    |   |         |         | no modules found |
| <a href="#">E-GEOD-30505</a><br>(array)    | i) L3, WT, EV, ii) L3, WT, <i>ash-2</i> RNAi, iii) L3, <i>glp-1</i> (e2141ts) mutants, EV, iv) L3, <i>glp-1</i> (e2141ts) mutants, <i>ash-2</i> RNAi, v) day 8, WT, EV, vi) day 8, WT, <i>ash-2</i> RNAi, vii) day 8, <i>glp-1</i> (e2141ts) mutants, EV, viii) day 8, <i>glp-1</i> (e2141ts) mutants, <i>ash-2</i> RNAi                                                                                      | The ASH-2 trithorax complex trimethylates histone H3 at lysine 4 (H3K4); <i>ash-2</i> knock-down increases lifespan in a germline dependent manner. <i>ash-2</i> knock-down was compared in young and old as well as in WT and germline deficient ( <i>glp-1</i> ) mutants ( <a href="#">Greer et al., 2010</a> ) | 23/2-3 | 4 | 854     | 60 (20) | (146)            |
| <a href="#">E-GEOD-32031</a><br>(array)    | i) <i>nhr-23</i> RNAi, ii) untreated                                                                                                                                                                                                                                                                                                                                                                          | Inhibition of <i>nhr-32</i> , important for growth and molting, in L2 larvae                                                                                                                                                                                                                                      | 6/3    | 1 | 124 (2) | 27 (5)  |                  |
| <a href="#">E-GEOD-32339</a><br>(array)    | i) L3 WT, ii) L3 <i>nep-1</i> mutants, iii) adult WT, iv) adult <i>nep-1</i> mutants                                                                                                                                                                                                                                                                                                                          | Comparison between wild-type and <i>nep-1</i> (homologue of human ECE1 (endothelin-converting enzyme 1) mutant strain                                                                                                                                                                                             | 10/2-3 | 3 | 867     | 57 (25) | (173)            |
| <a href="#">E-GEOD-35939</a><br>(array)    | embryonic touch-receptor cells with i) mutant Huntingtin (128Q) vs normal Huntingtin (19Q), ii) normal Huntingtin (19Q) vs GFP only                                                                                                                                                                                                                                                                           | Comparison of purified touch receptor neurons expressing mutant Huntingtin N-terminal fragment (expanded polyGlutamine) with normal Huntingtin N-terminal fragment                                                                                                                                                | 12/6   |   |         |         | no modules found |
| <a href="#">E-GEOD-36494</a><br>(RNA-se q) | i) WT, ii) WT + TAP (tobacco acid pyrophosphatase), iii) <i>rde-10</i> mutant, iv) <i>rde-10</i> mutant + TAP, v) <i>rde-11</i> mutant, vi) <i>rde-11</i> mutant + TAP                                                                                                                                                                                                                                        | The RDE-10/RDE-11 complex triggers RNAi induced mRNA degradation by association with target mRNA in <i>C. elegans</i> ( <a href="#">Yang et al., 2012</a> )                                                                                                                                                       | 12/2   |   |         |         | no modules found |
| <a href="#">E-GEOD-38877</a><br>(array)    | centrifuged at i) 1g, ii) 5g, iii) 10g, iv) 15g                                                                                                                                                                                                                                                                                                                                                               | Worms spun in centrifuge at elevated g values                                                                                                                                                                                                                                                                     | 18/3-9 |   |         |         | no modules found |
| <a href="#">E-GEOD-40459</a><br>(array)    | i) <i>rsd-2</i> (yp10) mutants, 25 °C, late generation, ii) <i>rsd-2</i> (yp10) mutants, 25 °C, early generation, iii) <i>rsd-2</i> (pk3307) mutants, 25 °C, late generation, iv) <i>rsd-2</i> (pk3307) mutants, 25 °C, early generation, v) <i>rsd-6</i> (pk3300) mutants, 25 °C, late generation, vi) <i>rsd-6</i> (pk3300) mutants, 25 °C, early generation, vii) <i>rsd-2</i> (yp10) mutants, 20 °C, late | Effects of transgeneration aging studied in early and late generation <i>rsd-2</i> and <i>rsd-6</i> mutants at the restrictive temperature of 25 °C and the permissive temperature of 20 °C                                                                                                                       | 36/3   |   |         |         | no modules found |

|                                            |                                                                                                                                                                                                                                                                                                                  |                                                                                                                                                                                                                                                                             |         |    |            |                  |
|--------------------------------------------|------------------------------------------------------------------------------------------------------------------------------------------------------------------------------------------------------------------------------------------------------------------------------------------------------------------|-----------------------------------------------------------------------------------------------------------------------------------------------------------------------------------------------------------------------------------------------------------------------------|---------|----|------------|------------------|
|                                            | generation, viii) <i>rsd-2</i> (yp10) mutants, 20 °C, early generation, ix) <i>rsd-2</i> (pk3307) mutants, 20°C, late generation, x) <i>rsd-2</i> (pk3307) mutants, 20°C, early generation, xi) <i>rsd-6</i> (pk3300) mutants, 20°C, late generation, xii) <i>rsd-6</i> (pk3300) mutants, 20°C, early generation |                                                                                                                                                                                                                                                                             |         |    |            |                  |
| <a href="#">E-GEOD-42192</a><br>(array)    | i) fed with E.coli OP50 for 3 days or ii) 10 days, iii) fed with <i>Lactobacillus rhamnosus</i> CNCM I-3690 for 3 days or iv) 10 days, v) fed with <i>Lactobacillus rhamnosus</i> CNCM I-4317 for 3 days or vi) 10 days                                                                                          | The lactic acid bacteria <i>Lactobacillus rhamnosus</i> (CNCM I-3690) increase worm's lifespan by antioxidative actions                                                                                                                                                     | 18/3    | 2  | 868 (71)   | 58 (15)          |
| <a href="#">E-GEOD-43864</a><br>(array)    | i) <i>nhr-114</i> RNAi, ii) <i>glp-1</i> (q224ts) mutants, iii) WT untreated, iv) WT + tryptophan                                                                                                                                                                                                                | The nuclear receptor <i>nhr-114</i> /HNF4 protects germline stem cells from dietary metabolites. The downregulation of <i>nhr-114</i> results in germline defects and sterility, which depends on tryptophan. Sterile <i>glp-1</i> mutants are used for comparison. animals | 12/3    | 9  | 1287 (263) | 73 (31)          |
| <a href="#">E-GEOD-46051</a><br>(RNA-se q) | i) day 1, ii) day 1 + 100 nM rotenone, iii) day 5, iv) day 5 + 100 nM rotenone, v) day 10, vi) day 10 + 100 nM rotenone, vii) day 20, viii) day 20 + 100 nM rotenone                                                                                                                                             | Deep sequencing of endogenous mRNA from <i>Caenorhabditis elegans</i> in the presence and absence of rotenone at 4 different time points ( <a href="#">Schmeisser et al., 2013</a> )                                                                                        | 22/2-3  | 21 | 3123 (474) | 264 (74)         |
| <a href="#">E-GEOD-51502</a><br>(array)    | i) genetically activated beta-catenin, ii) WT                                                                                                                                                                                                                                                                    | Use of an activated beta-catenin to identify Wnt/beta-catenin pathway target genes ( <a href="#">Jackson et al., 2014</a> )                                                                                                                                                 | 6/3     | 3  | 1302 (112) | 86 (27)          |
| <a href="#">E-GEOD-52340</a><br>(array)    | i) WT, ii) <i>rsk-1</i> mutants, iii) <i>daf-2</i> mutants, iv) <i>daf-2</i> ; <i>rsk-1</i> double mutants, v) <i>daf-16</i> ; <i>daf-2</i> ; <i>rsk-1</i> triple mutants                                                                                                                                        | Synergistic lifespan extension in <i>daf-2</i> ; <i>rsk-1</i> double mutants requires DAF-16 and the germline was identified as the key tissue for this synergistic longevity ( <a href="#">Chen et al., 2013</a> )                                                         | 47/9-10 |    |            | no modules found |
| <a href="#">E-GEOD-54853</a><br>(RNA-se q) | i) 100 µM D-Glucosamine, ii) untreated                                                                                                                                                                                                                                                                           | D-Glucosamine extends <i>C. elegans</i> lifespan by impairing glucose metabolism to activate AMP-activated protein kinase                                                                                                                                                   | 12/6    | 2  | 870 (0)    | 60 (20)          |
| <a href="#">E-GEOD-57739</a><br>(RNA-se q) | i) WT + standard food (OP50), ii) WT + <i>S. aureus</i> , iii) <i>hlh-30</i> mutants + OP50, iv) <i>hlh-30</i> mutants + <i>S. aureus</i>                                                                                                                                                                        | HLH-30/TFEB is a transcription factor in the host response to infections and regulates the transcription of cytoprotective and antimicrobial genes ( <a href="#">Visvikis et al., 2014</a> )                                                                                | 8/2     |    | 685 (55)   | 90 (28)          |
| <a href="#">E-GEOD-85342</a><br>(array)    | i) 5-fluorouracil, ii) DMSO                                                                                                                                                                                                                                                                                      | Treatment with 5-fluorouracil inhibits growth of <i>P. aeruginosa</i> and reduces pyoverdine biosynthesis                                                                                                                                                                   | 6/3     |    |            | no modules found |
| <a href="#">E-MEXP-479</a><br>(array)      | i) fed with standard food for 12h or ii) 24h, iii) fed with <i>Drechmeria coniospora</i> for                                                                                                                                                                                                                     | Exposure to the fungal pathogen <i>Drechmeria coniospora</i> for 12 and 24 hours ( <a href="#">Pujol et al., 2008</a> )                                                                                                                                                     | 64/16   |    |            | no modules found |

|                                        |                                                                                                                                                                                          |                                                                                                                           |      |   |      |                  |
|----------------------------------------|------------------------------------------------------------------------------------------------------------------------------------------------------------------------------------------|---------------------------------------------------------------------------------------------------------------------------|------|---|------|------------------|
|                                        | 12h or iv) 24h                                                                                                                                                                           |                                                                                                                           |      |   |      |                  |
| <a href="#">E-MTAB-1333</a><br>(array) | pash-1(mj100) mutants at restrictive temperature (25 °C for i) 0, ii) 6, iii) 12 or iv) 24 hours, pash-1(mj100); pash-1::gfp mutants at 25 °C for v) 0, vi) 6, vii) 12 or viii) 24 hours | Reversible inactivation of miRNA synthesis via DGCR8/pash-1 conditional mutants ( <a href="#">Lehrbach et al., 2012</a> ) | 24/3 | 6 | 1715 | 119 (58) (440)   |
| <a href="#">E-MEXP-1808</a><br>(array) | i) strain DR1350, ii) strain DR1350 + dauer pheromone, iii) WT N2, iv) WT N2 + dauer pheromone                                                                                           | Wild type isolates treated with dauer larva-inducing pheromone ( <a href="#">Harvey et al., 2009</a> )                    | 12/3 |   |      | no modules found |
| <a href="#">E-MEXP-1810</a><br>(array) | i) strain RIL-14, ii) strain RIL-14 + dauer pheromone, iii) strain RIL-17, iv) strain RIL-17 + dauer pheromone                                                                           | Wild type isolates treated with dauer larva-inducing pheromone                                                            | 12/3 | 6 | 261  | 65 (37) (108)    |

---

<sup>1</sup> total: total samples in this experiment; per group: samples per treatment-group (biological replicates)

**Supplement Table 2: Genes correlating with eigengene representation (module membership) of those modules that are correlating with the health score. The table lists all genes that appear in at least two experiments among the top 30 and a P value below 0.05. If the expression of the gene correlates positively with the health score then the gene is tagged as positive. The columns “cor” and “P val” list the values as determined by WGCNA. A negative correlation with a positive tag indicates that eigengene of the module is negatively correlated with the health score.**

| Gene          | health   | cor    | P val    | Experiment       | module        |
|---------------|----------|--------|----------|------------------|---------------|
| 0610006I08Rik | negative | 0.907  | 4.64e-05 | E-GEOD-19102     | darkmagenta   |
| 0610006I08Rik | negative | 0.942  | 4.57e-06 | E-GEOD-19102     | skyblue3      |
| 2010107E04Rik | positive | 0.951  | 6.24e-19 | E-GEOD-55272     | black         |
| 2010107E04Rik | positive | -0.947 | 2.10e-18 | E-GEOD-55272     | magenta       |
| ABAT          | positive | 0.988  | 2.21e-18 | E-GEOD-30505     | blue          |
| ABAT          | positive | -0.980 | 1.42e-12 | E-GEOD-42192     | turquoise     |
| ABCG1         | negative | -0.900 | 6.76e-05 | E-GEOD-19102     | sienna2       |
| ABCG1         | negative | 0.974  | 1.68e-23 | E-GEOD-55272     | red           |
| ABRA          | negative | 0.996  | 4.41e-12 | E-GEOD-43864     | brown         |
| ABRA          | negative | 0.989  | 2.90e-06 | E-GEOD-57739     | turquoise     |
| ABRA          | positive | -0.968 | 1.12e-14 | E-MTAB-1333      | blue          |
| abu-14        | positive | 0.993  | 5.68e-21 | E-GEOD-30505     | turquoise     |
| abu-14        | positive | 0.999  | 7.55e-07 | E-GEOD-9246      | turquoise     |
| AC068831.7    | negative | -0.868 | 2.48e-04 | E-GEOD-19102     | yellow3       |
| AC068831.7    | negative | 0.986  | 1.28e-18 | E-MTAB-1333      | turquoise     |
| AC106774.4    | negative | -0.873 | 2.13e-04 | E-MEXP-1810      | plum1         |
| AC106774.4    | negative | 0.938  | 6.73e-06 | E-MEXP-1810      | royalblue     |
| ADAM10        | negative | -0.871 | 7.20e-09 | E-GEOD-34773     | greenyellow   |
| ADAM10        | positive | 0.998  | 4.87e-13 | E-GEOD-43864     | turquoise     |
| AG01          | negative | -0.995 | 2.14e-09 | E-GEOD-32339     | blue          |
| AG01          | negative | -0.879 | 1.53e-08 | E-MTAB-1333      | black         |
| ain-1         | negative | 0.921  | 4.24e-04 | E-GEOD-8696      | cyan          |
| ain-1         | negative | 0.965  | 2.56e-05 | E-GEOD-8696      | royalblue     |
| APBB1IP       | positive | 0.987  | 2.78e-09 | E-GEOD-54853-CEL | yellow        |
| APBB1IP       | negative | 0.970  | 1.68e-07 | E-MTA-B6578      | blue          |
| AQP11         | positive | 0.997  | 2.57e-24 | E-GEOD-30505     | blue          |
| AQP11         | negative | 0.951  | 1.98e-06 | E-MEXP-1810      | brown         |
| ARMC1         | positive | -0.850 | 3.97e-08 | E-GEOD-34773     | darkgrey      |
| ARMC1         | positive | 0.874  | 5.48e-09 | E-GEOD-34773     | greenyellow   |
| asns-2        | negative | -0.993 | 7.01e-05 | E-GEOD-51502     | black         |
| asns-2        | positive | 0.984  | 8.21e-09 | E-GEOD-54853-CEL | brown         |
| ATP6V1B2      | negative | 0.978  | 4.00e-08 | E-GEOD-43864     | paleturquoise |
| ATP6V1B2      | negative | 0.967  | 2.76e-07 | E-GEOD-43864     | paleturquoise |
| ATP6V1B2      | positive | 0.999  | 2.07e-06 | E-GEOD-9246      | turquoise     |
| B2M           | negative | 0.927  | 1.03e-11 | E-GEOD-34773     | lightyellow   |
| B2M           | negative | 0.922  | 2.13e-11 | E-GEOD-34773     | lightyellow   |
| B2M           | negative | 0.975  | 6.82e-08 | E-MTAB6578       | blue          |
| C02E7.6       | positive | 0.993  | 4.20e-21 | E-GEOD-30505     | turquoise     |
| C02E7.6       | positive | 0.990  | 9.63e-10 | E-GEOD-43864     | yellow        |
| C09B9.2       | negative | 0.990  | 2.56e-06 | E-GEOD-57739     | turquoise     |
| C09B9.2       | positive | 0.989  | 1.36e-19 | E-MTAB-1333      | yellow        |
| C26F1.1       | positive | 0.989  | 1.13e-09 | E-GEOD-43864     | yellow        |
| C26F1.1       | negative | 0.982  | 4.60e-04 | E-GEOD-51502     | turquoise     |
| C46F2.1       | negative | -0.869 | 2.45e-04 | E-MEXP-1810      | plum1         |
| C46F2.1       | negative | 0.921  | 2.15e-05 | E-MEXP-1810      | royalblue     |

|         |          |        |          |                 |                |
|---------|----------|--------|----------|-----------------|----------------|
| C46G7.1 | positive | -0.979 | 1.62e-12 | E-GEOD-42192    | turquoise      |
| C46G7.1 | negative | 0.928  | 8.98e-04 | E-GEOD-57739    | darkgreen      |
| CAD     | negative | -0.875 | 1.93e-04 | E-MEXP-1810     | plum1          |
| CAD     | negative | 0.902  | 6.02e-05 | E-MEXP-1810     | royalblue      |
| CD151   | negative | 0.934  | 8.51e-06 | E-GEOD-19102    | darkmagenta    |
| CD151   | negative | -0.905 | 2.28e-10 | E-GEOD-34773    | tan            |
| CEBPB   | positive | 0.940  | 1.65e-04 | E-GEOD-38062    | salmon         |
| CEBPB   | negative | 0.812  | 5.27e-08 | E-GEOD-40936    | grey           |
| CLIC5   | negative | 0.842  | 6.00e-04 | E-GEOD-19102    | green3         |
| CLIC5   | negative | -0.883 | 2.42e-09 | E-GEOD-34773    | greenyellow    |
| comp-1  | negative | 0.991  | 2.09e-06 | E-GEOD-57739    | turquoise      |
| comp-1  | positive | 0.991  | 9.50e-21 | E-MTAB-1333     | yellow         |
| COX15   | positive | -0.890 | 1.19e-09 | E-GEOD-34773    | darkgrey       |
| COX15   | positive | -0.879 | 3.61e-09 | E-GEOD-34773    | darkgrey       |
| COX15   | positive | 0.923  | 1.79e-11 | E-GEOD-34773    | greenyellow    |
| cpg-2   | negative | -0.994 | 5.19e-09 | E-GEOD-32339    | blue           |
| cpg-2   | positive | 0.961  | 3.76e-05 | E-GEOD-8696     | red            |
| CRB1    | negative | -0.958 | 1.85e-04 | E-GEOD-57739    | darkorange     |
| CRB1    | positive | 0.989  | 1.48e-09 | E-GEOD54853-CEL | yellow         |
| CREBBP  | negative | 0.953  | 1.96e-05 | E-GEOD-32339    | pink           |
| CREBBP  | negative | 0.937  | 1.75e-12 | E-GEOD-34773    | red            |
| CREBBP  | negative | 0.958  | 4.89e-05 | E-GEOD-8696     | purple         |
| D2062.7 | positive | -0.969 | 4.07e-11 | E-GEOD-42192    | blue           |
| D2062.7 | positive | 0.985  | 1.99e-18 | E-MTAB-1333     | yellow         |
| DCP2    | negative | 0.928  | 1.74e-10 | E-GEOD-30505    | black          |
| DCP2    | negative | -0.997 | 2.13e-10 | E-GEOD-32339    | blue           |
| DDX4    | positive | -0.998 | 3.10e-13 | E-GEOD-43864    | blue           |
| DDX4    | negative | -0.877 | 1.77e-04 | E-MEXP-1810     | lightcyan      |
| DEPDC1B | negative | 0.915  | 9.48e-10 | E-GEOD-30505    | black          |
| DEPDC1B | positive | -0.934 | 2.28e-04 | E-GEOD-8696     | cyan           |
| dnj-3   | positive | 0.940  | 5.49e-06 | E-GEOD-43864    | royalblue      |
| dnj-3   | negative | 0.924  | 1.05e-03 | E-GEOD-57739    | darkgreen      |
| dnj-3   | negative | 0.974  | 9.23e-16 | E-MTAB-1333     | brown          |
| DRG1    | negative | 0.993  | 6.92e-05 | E-GEOD-51502    | turquoise      |
| DRG1    | negative | 0.925  | 1.64e-05 | E-MEXP-1810     | brown          |
| EEF1B2  | negative | -0.866 | 2.71e-04 | E-GEOD-19102    | deeppink       |
| EEF1B2  | positive | 0.948  | 1.93e-13 | E-GEOD-34773    | green          |
| egg-2   | positive | -0.998 | 8.73e-14 | E-GEOD-43864    | blue           |
| egg-2   | positive | -0.998 | 2.95e-13 | E-GEOD-43864    | blue           |
| egg-2   | positive | 0.964  | 2.85e-05 | E-GEOD-8696     | red            |
| EIF3F   | positive | -0.929 | 7.24e-12 | E-GEOD-34773    | purple         |
| EIF3F   | positive | 0.999  | 9.64e-07 | E-GEOD-9246     | turquoise      |
| EMC3    | negative | -0.915 | 5.49e-04 | E-GEOD-38062    | darkgreen      |
| EMC3    | negative | 0.954  | 6.54e-05 | E-GEOD-38062    | plum1          |
| F45D3.4 | positive | 0.935  | 8.05e-06 | E-MEXP-1810     | darkmagenta    |
| F45D3.4 | positive | -0.917 | 2.69e-05 | E-MEXP-1810     | royalblue      |
| F55A3.2 | positive | 0.867  | 2.62e-04 | E-MEXP-1810     | darkmagenta    |
| F55A3.2 | positive | 0.876  | 1.89e-04 | E-MEXP-1810     | darkolivegreen |
| FBLN7   | negative | 0.877  | 1.83e-04 | E-GEOD-19102    | green3         |
| FBLN7   | negative | 0.909  | 1.37e-10 | E-GEOD-34773    | magenta        |
| fbk-7   | positive | -0.995 | 4.39e-05 | E-GEOD-51502    | turquoise      |
| fbk-7   | positive | 0.965  | 1.05e-04 | E-GEOD-57739    | sienna3        |
| flp-15  | positive | 0.959  | 8.29e-07 | E-MEXP-1810     | plum1          |
| flp-15  | positive | 0.914  | 3.14e-05 | E-MEXP-1810     | plum1          |

|          |          |        |          |                 |                |
|----------|----------|--------|----------|-----------------|----------------|
| flp-15   | positive | -0.898 | 7.43e-05 | E-MEXP-1810     | royalblue      |
| GMFG     | negative | 0.892  | 9.67e-05 | E-GEOD-19102    | darkmagenta    |
| GMFG     | negative | 0.984  | 6.89e-27 | E-GEOD-55272    | red            |
| GNG10    | negative | 0.927  | 1.40e-05 | E-GEOD-19102    | darkmagenta    |
| GNG10    | positive | 0.959  | 3.66e-20 | E-GEOD-55272    | yellow         |
| GPR142   | negative | 0.990  | 7.71e-10 | E-GEOD-43864    | lightgreen     |
| GPR142   | negative | 0.979  | 3.46e-08 | E-GEOD-43864    | lightgreen     |
| GPR142   | negative | 0.925  | 3.56e-04 | E-GEOD-8696     | cyan           |
| grl-7    | positive | 0.992  | 4.32e-20 | E-GEOD-30505    | turquoise      |
| grl-7    | positive | 0.993  | 1.22e-10 | E-GEOD-43864    | yellow         |
| grl-7    | positive | 0.991  | 3.61e-10 | E-GEOD-43864    | yellow         |
| grl-7    | positive | 0.991  | 3.91e-10 | E-GEOD-43864    | yellow         |
| GSTA2    | positive | 0.992  | 3.59e-20 | E-GEOD-30505    | blue           |
| GSTA2    | negative | 0.976  | 6.93e-06 | E-GEOD-8696     | purple         |
| GSTA2    | negative | 0.953  | 1.73e-06 | E-MEXP-1810     | brown          |
| H2-D1    | negative | 0.951  | 9.09e-14 | E-GEOD-34773    | lightyellow    |
| H2-D1    | negative | 0.948  | 1.95e-13 | E-GEOD-34773    | lightyellow    |
| H2-D1    | negative | 0.941  | 9.01e-13 | E-GEOD-34773    | lightyellow    |
| H2-D1    | negative | 0.894  | 7.30e-10 | E-GEOD-34773    | lightyellow    |
| H2-D1    | negative | 0.974  | 9.03e-08 | EMTAB6578       | blue           |
| H42K12.3 | positive | 0.992  | 2.23e-20 | E-GEOD-30505    | turquoise      |
| H42K12.3 | positive | 0.988  | 2.15e-04 | E-GEOD-51502    | blue           |
| HACL1    | positive | 0.881  | 1.55e-04 | E-MEXP-1810     | plum1          |
| HACL1    | positive | -0.963 | 5.25e-07 | E-MEXP-1810     | royalblue      |
| HACL1    | positive | -0.908 | 4.46e-05 | E-MEXP-1810     | royalblue      |
| HSDL2    | positive | 0.940  | 5.23e-04 | E-GEOD-57739    | darkorange     |
| HSDL2    | positive | 0.949  | 2.39e-06 | E-MEXP-1810     | lightcyan      |
| IHH      | negative | 0.933  | 2.34e-04 | E-GEOD-8696     | cyan           |
| IHH      | positive | 0.999  | 2.32e-06 | E-GEOD-9246     | turquoise      |
| INTS12   | negative | -0.845 | 5.42e-04 | E-GEOD-19102    | yellow3        |
| INTS12   | positive | -0.980 | 2.32e-08 | E-GEOD-43864    | paleturquoise  |
| K08C9.2  | negative | 0.997  | 8.50e-13 | E-GEOD-43864    | brown          |
| K08C9.2  | positive | 0.986  | 1.88e-18 | E-MTAB-1333     | yellow         |
| KPNA3    | negative | 0.932  | 4.18e-12 | E-GEOD-34773    | red            |
| KPNA3    | positive | 0.999  | 2.92e-06 | E-GEOD-9246     | turquoise      |
| let-2    | positive | 0.992  | 1.36e-20 | E-GEOD-30505    | blue           |
| let-2    | positive | -0.979 | 1.83e-12 | E-GEOD-42192    | turquoise      |
| LIAS     | positive | -0.921 | 2.67e-11 | E-GEOD-34773    | black          |
| LIAS     | positive | 0.880  | 3.27e-09 | E-GEOD-34773    | tan            |
| LIN28A   | positive | -0.998 | 1.06e-13 | E-GEOD-43864    | blue           |
| LIN28A   | positive | -0.998 | 2.15e-13 | E-GEOD-43864    | blue           |
| LIN28A   | negative | -0.877 | 1.78e-04 | E-MEXP-1810     | darkolivegreen |
| MARCKS   | negative | 0.967  | 3.10e-07 | E-GEOD-19102    | blue           |
| MARCKS   | negative | 0.918  | 4.08e-11 | E-GEOD-34773    | magenta        |
| MEX3C    | negative | -0.994 | 7.28e-09 | E-GEOD-32339    | blue           |
| MEX3C    | negative | 0.948  | 6.71e-13 | E-GEOD-38012    | yellow         |
| mig-6    | positive | -0.978 | 2.21e-12 | E-GEOD-42192    | turquoise      |
| mig-6    | positive | 0.984  | 8.04e-09 | E-GEOD54853-CEL | yellow         |
| MRAS     | positive | 0.989  | 5.85e-19 | E-GEOD-30505    | blue           |
| MRAS     | positive | -0.965 | 3.01e-14 | E-MTAB-1333     | blue           |
| MRPL13   | positive | -0.886 | 1.74e-09 | E-GEOD-34773    | darkgrey       |
| MRPL13   | positive | -0.878 | 3.75e-09 | E-GEOD-34773    | darkgrey       |
| MRPL13   | positive | 0.867  | 9.86e-09 | E-GEOD-34773    | greenyellow    |
| MRPL19   | positive | -0.869 | 8.64e-09 | E-GEOD-34773    | darkgrey       |

|         |          |        |          |                |                 |
|---------|----------|--------|----------|----------------|-----------------|
| MRPL19  | negative | 0.951  | 1.96e-06 | E-MEXP-1810    | brown           |
| MRPL30  | negative | 0.888  | 1.13e-04 | E-GEOD-19102   | skyblue3        |
| MRPL30  | positive | 0.939  | 2.45e-17 | E-GEOD-55272   | black           |
| MTPAP   | negative | -0.992 | 3.65e-20 | E-GEOD-30505   | blue            |
| MTPAP   | negative | -0.995 | 2.69e-09 | E-GEOD-32339   | blue            |
| Myeov2  | positive | 0.931  | 1.71e-16 | E-GEOD-55272   | black           |
| Myeov2  | positive | -0.976 | 5.77e-24 | E-GEOD-55272   | magenta         |
| MYL1    | positive | -0.996 | 3.24e-25 | E-GEOD-38012   | turquoise       |
| MYL1    | positive | 0.985  | 1.49e-06 | E-GEOD-38062   | tan             |
| MYL7    | negative | 0.895  | 8.28e-05 | E-GEOD-19102   | skyblue3        |
| MYL7    | negative | 0.901  | 6.40e-05 | EGEOD54853-MMU | darkturquoise   |
| NDUFS1  | positive | 0.862  | 3.07e-04 | E-GEOD-19102   | coral1          |
| NDUFS1  | positive | 0.877  | 1.77e-04 | E-GEOD-19102   | lightsteelblue1 |
| NR1H2   | positive | 0.983  | 1.22e-08 | E-GEOD-43864   | darkorange      |
| NR1H2   | negative | -0.909 | 1.75e-03 | E-GEOD-57739   | sienna3         |
| NR1H2   | positive | 0.883  | 1.42e-04 | E-MEXP-1810    | darkolivegreen  |
| NR1H2   | positive | 0.851  | 4.51e-04 | E-MEXP-1810    | darkolivegreen  |
| NR1H2   | positive | 0.894  | 3.95e-09 | E-MTAB-1333    | black           |
| NRBP1   | negative | 0.855  | 2.64e-08 | E-GEOD-34773   | darkgrey        |
| NRBP1   | negative | 0.969  | 4.13e-22 | E-GEOD-55272   | pink            |
| Pabpc1  | positive | -0.887 | 1.21e-04 | E-GEOD-19102   | darkmagenta     |
| Pabpc1  | negative | 0.969  | 2.22e-07 | EMTAB6578      | blue            |
| PAXIP1  | positive | 0.890  | 1.03e-04 | E-GEOD-19102   | deeppink        |
| PAXIP1  | positive | 0.998  | 2.67e-13 | E-GEOD-43864   | turquoise       |
| PCNX2   | negative | 0.962  | 7.78e-14 | E-MTAB-1333    | blue            |
| PCNX2   | negative | 0.907  | 4.66e-05 | EGEOD54853-MMU | darkturquoise   |
| PDCD6   | negative | -0.959 | 8.71e-07 | E-GEOD-43864   | royalblue       |
| PDCD6   | negative | 0.928  | 6.50e-11 | E-MTAB-1333    | green           |
| PFAS    | positive | -0.858 | 2.13e-08 | E-GEOD-34773   | darkgrey        |
| PFAS    | positive | 0.941  | 8.58e-13 | E-GEOD-34773   | greenyellow     |
| PPIA    | positive | -0.975 | 6.83e-12 | E-GEOD-42192   | blue            |
| PPIA    | negative | 0.918  | 2.52e-05 | E-MEXP-1810    | royalblue       |
| PPIC    | negative | 0.981  | 1.67e-08 | E-GEOD-19102   | blue            |
| PPIC    | negative | 0.981  | 1.97e-08 | E-GEOD-19102   | blue            |
| PPIC    | negative | 0.917  | 4.55e-11 | E-GEOD-34773   | magenta         |
| PPP1CA  | positive | 0.987  | 2.48e-04 | E-GEOD-51502   | black           |
| PPP1CA  | negative | 0.991  | 1.68e-06 | E-GEOD-57739   | turquoise       |
| PPP1CA  | positive | 0.993  | 2.02e-14 | E-GEOD-66236   | turquoise       |
| PPP1CA  | positive | 0.989  | 9.26e-20 | E-MTAB-1333    | yellow          |
| PPP1CB  | positive | -0.979 | 4.67e-06 | E-GEOD-38062   | turquoise       |
| PPP1CB  | positive | 0.999  | 1.18e-06 | E-GEOD-9246    | turquoise       |
| PPP2R3C | negative | 0.944  | 1.38e-12 | E-GEOD-38012   | yellow          |
| PPP2R3C | negative | 0.966  | 1.31e-21 | E-GEOD-55272   | pink            |
| pqn-32  | positive | 0.993  | 3.79e-21 | E-GEOD-30505   | turquoise       |
| pqn-32  | positive | 0.993  | 1.60e-10 | E-GEOD-43864   | yellow          |
| pqn-32  | positive | 0.989  | 1.27e-09 | E-GEOD-43864   | yellow          |
| PSMD4   | positive | 0.932  | 9.87e-06 | E-GEOD-19102   | lightpink2      |
| PSMD4   | negative | 0.848  | 4.59e-08 | E-GEOD-34773   | darkgrey        |
| ptp-2   | negative | -0.937 | 7.07e-06 | E-MEXP-1810    | plum1           |
| ptp-2   | negative | 0.932  | 1.03e-05 | E-MEXP-1810    | royalblue       |
| PUM1    | negative | -0.995 | 3.07e-09 | E-GEOD-32339   | blue            |
| PUM1    | negative | -0.995 | 3.51e-09 | E-GEOD-32339   | blue            |
| PUM1    | positive | 0.986  | 9.40e-07 | E-GEOD-8696    | red             |
| R3HDML  | negative | -0.898 | 7.34e-05 | E-MEXP-1810    | plum1           |



|        |          |        |          |              |             |
|--------|----------|--------|----------|--------------|-------------|
| R3HDML | negative | 0.928  | 1.33e-05 | E-MEXP-1810  | royalblue   |
| R3HDML | negative | 0.916  | 2.80e-05 | E-MEXP-1810  | royalblue   |
| RAB2A  | negative | 0.965  | 6.41e-06 | E-GEOD-32339 | pink        |
| RAB2A  | negative | 0.960  | 2.47e-20 | E-GEOD-55272 | pink        |
| RAB31  | negative | 0.952  | 1.77e-06 | E-GEOD-19102 | blue        |
| RAB31  | negative | 0.971  | 1.37e-05 | E-GEOD-38062 | turquoise   |
| RAD17  | negative | 0.994  | 5.90e-09 | E-GEOD-32339 | turquoise   |
| RAD17  | negative | 0.982  | 1.90e-17 | E-MTAB-1333  | turquoise   |
| RGL1   | negative | 0.956  | 1.25e-06 | E-GEOD-19102 | blue        |
| RGL1   | positive | -0.687 | 2.76e-05 | E-GEOD-40936 | grey        |
| RMDN3  | positive | -0.971 | 2.12e-11 | E-GEOD-42192 | blue        |
| RMDN3  | negative | 0.999  | 3.97e-14 | E-GEOD-43864 | brown       |
| RMDN3  | negative | 0.996  | 4.43e-12 | E-GEOD-43864 | brown       |
| RMDN3  | positive | 0.967  | 2.03e-05 | E-GEOD-8696  | red         |
| RPL11  | positive | 0.929  | 7.00e-12 | E-GEOD-34773 | green       |
| RPL11  | positive | 0.963  | 7.42e-21 | E-GEOD-55272 | yellow      |
| RPL13A | positive | 0.936  | 2.43e-12 | E-GEOD-34773 | green       |
| RPL13A | positive | -0.959 | 1.11e-14 | E-GEOD-34773 | purple      |
| RPL23A | positive | 0.934  | 3.34e-12 | E-GEOD-34773 | green       |
| RPL23A | positive | 0.929  | 7.50e-12 | E-GEOD-34773 | green       |
| RPL23A | positive | -0.966 | 1.56e-15 | E-GEOD-34773 | purple      |
| RPL23A | positive | -0.939 | 1.26e-12 | E-GEOD-34773 | purple      |
| RPL23A | positive | -0.934 | 3.44e-12 | E-GEOD-34773 | purple      |
| RPL27  | positive | 0.930  | 6.54e-12 | E-GEOD-34773 | green       |
| RPL27  | positive | -0.963 | 4.04e-15 | E-GEOD-34773 | purple      |
| Rpl27a | positive | 0.935  | 2.52e-12 | E-GEOD-34773 | green       |
| Rpl27a | positive | 0.965  | 2.64e-21 | E-GEOD-55272 | yellow      |
| RPL29  | positive | 0.940  | 1.09e-12 | E-GEOD-34773 | green       |
| RPL29  | positive | 0.976  | 7.35e-06 | E-GEOD-38062 | tan         |
| RPS12  | positive | 0.942  | 7.63e-13 | E-GEOD-34773 | green       |
| RPS12  | positive | -0.926 | 1.28e-11 | E-GEOD-34773 | purple      |
| RPS21  | positive | 0.954  | 4.18e-14 | E-GEOD-34773 | green       |
| RPS21  | positive | 0.937  | 1.87e-12 | E-GEOD-34773 | green       |
| RPS21  | positive | -0.923 | 1.82e-11 | E-GEOD-34773 | purple      |
| Rps25  | positive | 0.960  | 1.00e-14 | E-GEOD-34773 | green       |
| Rps25  | positive | -0.927 | 1.02e-11 | E-GEOD-34773 | purple      |
| Rps29  | positive | 0.935  | 2.90e-12 | E-GEOD-34773 | green       |
| Rps29  | positive | -0.954 | 4.47e-14 | E-GEOD-34773 | purple      |
| RPS7   | negative | -0.905 | 5.22e-05 | E-GEOD-19102 | deeppink    |
| RPS7   | positive | -0.923 | 1.92e-11 | E-GEOD-34773 | purple      |
| RTN2   | negative | 0.861  | 1.66e-08 | E-GEOD-34773 | darkgrey    |
| RTN2   | positive | -0.995 | 2.44e-24 | E-GEOD-38012 | turquoise   |
| RYR1   | positive | 0.883  | 1.43e-04 | E-GEOD-19102 | sienna2     |
| RYR1   | positive | -0.994 | 2.21e-23 | E-GEOD-38012 | turquoise   |
| SCN3B  | positive | -0.879 | 1.67e-04 | E-GEOD-19102 | green3      |
| SCN3B  | positive | -0.956 | 5.85e-05 | E-GEOD-38062 | yellowgreen |
| SFT2D2 | negative | -0.929 | 2.73e-16 | E-GEOD-55272 | black       |
| SFT2D2 | negative | 0.975  | 8.14e-24 | E-GEOD-55272 | magenta     |
| sgo-1  | positive | -0.998 | 1.68e-13 | E-GEOD-43864 | blue        |
| sgo-1  | negative | 0.985  | 3.18e-18 | E-MTAB-1333  | turquoise   |
| SIK1B  | negative | 0.992  | 1.18e-06 | E-GEOD-57739 | turquoise   |
| SIK1B  | positive | 0.989  | 1.13e-19 | E-MTAB-1333  | yellow      |
| SIX4   | negative | 0.954  | 1.74e-12 | E-GEOD-30505 | red         |
| SIX4   | negative | -0.871 | 7.31e-09 | E-GEOD-34773 | greenyellow |

|          |          |        |          |                |                 |
|----------|----------|--------|----------|----------------|-----------------|
| SKP1     | negative | 0.995  | 2.19e-09 | E-GEOD-32339   | turquoise       |
| SKP1     | negative | 0.940  | 9.01e-12 | E-MTAB-1333    | green           |
| SKP1     | negative | 0.924  | 1.21e-10 | E-MTAB-1333    | green           |
| SLC16A9  | positive | 0.989  | 1.02e-18 | E-GEOD-30505   | blue            |
| SLC16A9  | negative | -0.911 | 3.81e-05 | E-MEXP-1810    | darkmagenta     |
| SLC7A11  | negative | 0.960  | 1.19e-13 | E-MTAB-1333    | blue            |
| SLC7A11  | positive | 0.987  | 2.50e-09 | EGEOD54853-CEL | brown           |
| smz-2    | positive | -0.970 | 3.19e-11 | E-GEOD-42192   | blue            |
| smz-2    | positive | 0.988  | 2.18e-19 | E-MTAB-1333    | yellow          |
| SNRPD1   | negative | -0.875 | 1.91e-04 | E-GEOD-19102   | lightsteelblue1 |
| SNRPD1   | negative | 0.954  | 6.08e-13 | E-MTAB-1333    | brown           |
| somi-1   | positive | 0.917  | 2.74e-05 | E-MEXP-1810    | plum1           |
| somi-1   | positive | 0.993  | 1.50e-10 | EGEOD54853-CEL | yellow          |
| spe-38   | negative | -0.976 | 6.37e-08 | E-GEOD-43864   | darkorange      |
| spe-38   | negative | 0.992  | 2.98e-10 | E-GEOD-43864   | lightgreen      |
| SQSTM1   | negative | 0.959  | 1.07e-14 | E-GEOD-34773   | black           |
| SQSTM1   | negative | 0.924  | 3.74e-04 | E-GEOD-38062   | yellowgreen     |
| SQSTM1   | positive | 0.885  | 1.29e-04 | E-MEXP-1810    | lightcyan       |
| sss-2    | positive | -0.970 | 3.11e-11 | E-GEOD-42192   | blue            |
| sss-2    | positive | 0.990  | 5.42e-20 | E-MTAB-1333    | yellow          |
| T14G11.1 | negative | -0.955 | 2.26e-04 | E-GEOD-57739   | darkorange      |
| T14G11.1 | negative | -0.909 | 7.81e-10 | E-MTAB-1333    | black           |
| T19D12.2 | negative | 0.979  | 6.61e-04 | E-GEOD-51502   | turquoise       |
| T19D12.2 | positive | -0.892 | 9.42e-05 | E-MEXP-1810    | royalblue       |
| T22B3.3  | negative | 0.998  | 3.30e-08 | E-GEOD-57739   | turquoise       |
| T22B3.3  | positive | 0.989  | 1.42e-19 | E-MTAB-1333    | yellow          |
| T28B11.1 | positive | -0.928 | 1.39e-05 | E-MEXP-1810    | brown           |
| T28B11.1 | negative | 0.964  | 3.65e-14 | E-MTAB-1333    | blue            |
| T28H11.7 | positive | -0.981 | 8.69e-13 | E-GEOD-42192   | blue            |
| T28H11.7 | positive | 0.987  | 4.02e-19 | E-MTAB-1333    | yellow          |
| TGIF2    | negative | 0.964  | 7.01e-06 | E-GEOD-32339   | pink            |
| TGIF2    | positive | 0.883  | 1.08e-08 | E-MTAB-1333    | black           |
| TMEM70   | positive | -0.913 | 8.24e-11 | E-GEOD-34773   | darkgrey        |
| TMEM70   | negative | 0.952  | 1.87e-06 | E-MEXP-1810    | brown           |
| TNNI2    | positive | 0.905  | 5.22e-05 | E-MEXP-1810    | plum1           |
| TNNI2    | positive | 0.870  | 2.34e-04 | E-MEXP-1810    | plum1           |
| TNNI2    | positive | 0.992  | 3.43e-10 | EGEOD54853-CEL | brown           |
| TOMM70   | positive | -0.917 | 2.70e-05 | E-GEOD-19102   | darkmagenta     |
| TOMM70   | positive | 0.879  | 1.65e-04 | E-GEOD-19102   | deeppink        |
| TUBG1    | negative | 0.948  | 1.03e-04 | E-GEOD-38062   | plum1           |
| TUBG1    | positive | 0.987  | 1.43e-12 | E-GEOD-66236   | turquoise       |
| UBE2E1   | negative | -0.989 | 7.37e-19 | E-GEOD-30505   | blue            |
| UBE2E1   | negative | -0.993 | 8.90e-09 | E-GEOD-32339   | blue            |
| UGT3A1   | positive | -0.979 | 1.55e-12 | E-GEOD-42192   | turquoise       |
| UGT3A1   | positive | 0.935  | 6.68e-04 | E-GEOD-57739   | sienna3         |
| UTY      | negative | 0.986  | 2.97e-04 | E-GEOD-51502   | turquoise       |
| UTY      | positive | 0.985  | 6.35e-09 | EGEOD54853-CEL | yellow          |
| VAMP3    | negative | -0.912 | 9.32e-11 | E-GEOD-34773   | greenyellow     |
| VAMP3    | negative | -0.885 | 1.96e-09 | E-GEOD-34773   | tan             |
| VRK2     | positive | -0.972 | 1.70e-11 | E-GEOD-42192   | blue            |
| VRK2     | negative | -0.935 | 8.29e-06 | E-GEOD-43864   | darkorange      |
| VRK2     | negative | 0.996  | 1.77e-07 | E-GEOD-57739   | turquoise       |
| VRK2     | negative | 0.993  | 9.81e-07 | E-GEOD-57739   | turquoise       |
| VRK2     | negative | 0.982  | 2.26e-17 | E-MTAB-1333    | turquoise       |

|           |          |        |          |                 |              |
|-----------|----------|--------|----------|-----------------|--------------|
| VRK2      | positive | 0.990  | 3.87e-20 | E-MTAB-1333     | yellow       |
| VRK2      | positive | 0.989  | 1.44e-19 | E-MTAB-1333     | yellow       |
| VRK2      | positive | 0.986  | 1.55e-18 | E-MTAB-1333     | yellow       |
| W03G11.4  | positive | 0.993  | 1.43e-10 | E-GEOD-43864    | yellow       |
| W03G11.4  | positive | 0.990  | 8.23e-10 | E-GEOD-43864    | yellow       |
| W03G11.4  | positive | 0.998  | 3.84e-06 | E-GEOD-9246     | turquoise    |
| W03G11.4  | positive | 0.990  | 6.47e-10 | E-GEOD54853-CEL | yellow       |
| WDR47     | negative | -0.993 | 6.36e-05 | E-GEOD-51502    | black        |
| WDR47     | positive | 0.947  | 2.94e-06 | E-MEXP-1810     | darkmagenta  |
| WIPF1     | negative | 0.954  | 1.55e-06 | E-GEOD-19102    | blue         |
| WIPF1     | negative | 0.919  | 3.60e-11 | E-GEOD-34773    | magenta      |
| WIPF1     | negative | 0.962  | 6.73e-14 | E-MTAB-1333     | blue         |
| Y42H9AR.4 | negative | 0.942  | 2.15e-11 | E-GEOD-30505    | black        |
| Y42H9AR.4 | negative | -0.996 | 1.78e-09 | E-GEOD-32339    | blue         |
| ZC3H15    | negative | 0.982  | 1.56e-08 | E-GEOD-43864    | midnightblue |
| ZC3H15    | negative | -0.978 | 7.07e-25 | E-GEOD-55272    | yellow       |
| ZFP36     | negative | -0.994 | 4.29e-09 | E-GEOD-32339    | blue         |
| ZFP36     | negative | -0.994 | 4.60e-09 | E-GEOD-32339    | blue         |
| ZFP36     | positive | 0.971  | 1.33e-05 | E-GEOD-8696     | red          |

**Supplement Table 3: Hub genes found by quantile normalization with an export of 60 genes per health-associated module. 67 genes were identified as hub genes with the same WGCNA cross-species consensus protocol when a quantile normalization was performed on the expression data. Only 13 genes were found in a cross-species consensus when 30 genes were exported.**

|            |             |
|------------|-------------|
| ABCD4      | worm,human  |
| ABCE1      | mouse,worm  |
| AKR7L      | mouse,rat   |
| AL669918.1 | mouse,worm  |
| ANXA2      | mouse,human |
| ATF2       | mouse,worm  |
| BAP1       | mouse,worm  |
| BRD8       | mouse,worm  |
| C4BPA      | mouse,rat   |
| CAPN7      | worm,mouse  |
| CASP1      | mouse,rat   |
| CEBPB      | worm,mouse  |
| DAB2       | mouse,worm  |
| DIMT1      | mouse,worm  |
| EIF5A      | mouse,worm  |
| ELOA       | mouse,rat   |
| EXOC6      | mouse,worm  |
| FBXO32     | mouse,human |
| FKBP9      | mouse,rat   |
| GBP2       | mouse,rat   |
| GDF15      | mouse,human |
| GPSM3      | mouse,rat   |
| GRASP      | mouse,worm  |
| HIST1H2BA  | mouse,worm  |
| HSPB3      | mouse,human |
| IDH3A      | rat,worm    |
| ILF2       | mouse,human |
| ITM2A      | worm,mouse  |
| LUZP1      | rat,worm    |
| MAP2K5     | worm,human  |

|          |             |
|----------|-------------|
| MED17    | worm,mouse  |
| MFN1     | mouse,rat   |
| MRPL12   | mouse,worm  |
| MRPL51   | mouse,worm  |
| NAA25    | mouse,worm  |
| NFYA     | worm,mouse  |
| NKG7     | mouse,rat   |
| OGA      | rat,human   |
| OR2Y1    | mouse,rat   |
| PDIA4    | mouse,rat   |
| PIPOX    | mouse,worm  |
| PLD4     | worm,mouse  |
| PPP1CA   | worm,human  |
| PPP3CB   | mouse,worm  |
| PRKCZ    | mouse,worm  |
| PRPF38A  | mouse,worm  |
| PSMB9    | mouse,rat   |
| PSMD12   | mouse,rat   |
| RAB8B    | mouse,worm  |
| RAMP1    | human,rat   |
| RMI1     | mouse,worm  |
| RMND5A   | worm,mouse  |
| RPL13A   | mouse,worm  |
| RTN2     | mouse,human |
| SCLY     | mouse,rat   |
| SCN1B    | human,rat   |
| SDCBP    | mouse,worm  |
| SDF2     | mouse,worm  |
| SERPINF1 | mouse,rat   |
| SKP1     | rat,worm    |
| SQOR     | worm,mouse  |
| SQSTM1   | mouse,worm  |
| SRD5A2   | mouse,worm  |
| SSRP1    | mouse,worm  |
| TRUB2    | mouse,worm  |
| UBC      | mouse,worm  |
| UBE4B    | worm,mouse  |

**Supplement Table 4: Genes in interactions found by quantile normalization with an export of 60 genes per health-associated module.** 44 genes were identified as hub genes with the same WGCNA cross-species consensus protocol when a quantile normalization was performed on the expression data. Only 10 genes were found in a cross-species consensus when 30 genes were exported per module. This was not found to be significant in a permutation test.

|            |            |
|------------|------------|
| AASDHPPT   | mouse,worm |
| ABCE1      | mouse,worm |
| ACOT9      | mouse,worm |
| ACVR1      | worm,mouse |
| AL669918.1 | mouse,worm |
| ANTKMT     | worm,mouse |
| BAP1       | mouse,worm |
| BCS1L      | rat,worm   |
| CAMK2B     | human,rat  |
| CEBPB      | worm,mouse |
| CETN2      | worm,rat   |
| CUL1       | mouse,worm |

|          |                  |
|----------|------------------|
| DAB2     | mouse,worm       |
| DAG1     | mouse,worm       |
| DBH      | mouse,worm       |
| EDF1     | mouse,worm       |
| FAAH     | mouse,worm       |
| FRA10AC1 | mouse,worm       |
| GTPBP10  | mouse,worm       |
| ITGA3    | worm,mouse       |
| KCNK6    | mouse,worm       |
| LMBR1L   | worm,mouse       |
| LONRF1   | mouse,worm       |
| MED11    | mouse,worm       |
| MINDY2   | worm,mouse       |
| MRPL19   | mouse,worm       |
| NF2      | worm,mouse       |
| OXSM     | mouse,worm       |
| PAXIP1   | mouse,worm       |
| PFDN1    | worm,mouse       |
| PPP1CA   | worm,human       |
| PRPF38A  | mouse,worm       |
| RFK      | worm,mouse       |
| RMND5A   | mouse,worm       |
| RNF7     | worm,mouse       |
| SLC35B1  | worm,human       |
| SLC38A10 | worm,mouse       |
| SOX2     | mouse,worm       |
| SSRP1    | mouse,worm       |
| STAT1    | mouse,worm       |
| TIMP3    | mouse,worm       |
| VPS11    | mouse,worm       |
| ILF2     | mouse,human,worm |
